# Supplementary material for: OGT binds a conserved C-terminal domain of TET1 to regulate TET1 activity and function in development
Source: eLife. 2018 Oct 16;7:e34870. doi: 10.7554/eLife.34870 (PMC6214653; doi:10.7554/eLife.34870)
Supplement: Figure 4—source data 1. — (A) and rD2018A (B) used to generate graphs in Figure 4D (A) and Figure 4F (B). 5hmC signal for TET1 alone is set to one for each replicate. [file elife-34870-fig4-data1.xlsx]

## Sheet: A. TET1 wt
TET1 CD wt replicate 1								Relative 5hmC 1	Relative 5hmC 2	Relative 5hmC 3	Relative 5hmC 4	Relative 5hmC 5	Average	StDev
	5hmC	Loading	5hmC/Loading	Relative 5hmC			TET1 CD wt	1	1	1	1	1	1	0
TET1 CD wt	34850	140418	0.248188	1			TET1 CD wt + UDP-GlcNAc	0.46	0.61	0.55	0.34	1.24	0.64	0.3505
TET1 CD wt + UDP-GlcNAc	19107	165983	0.115114	0.463819			TET1 CD wt + OGT	1.74	1.37	1.28	1.7		1.5225	0.231571
TET1 CD wt + OGT	63876	148271	0.430806	1.73581			TET1 CD wt + OGT + UDP-GlcNAc	5.31	4.13	3.85			4.43	0.774855
TET1 CD wt + OGT + UDP-GlcNAc	160317	121688	1.31744	5.30826
TET1 CD wt replicate 2
	5hmC	Loading	5hmC/Loading	Relative 5hmC
TET1 CD wt	57073	176630	0.323122	1
TET1 CD wt + UDP-GlcNAc	29268	148484	0.197112	0.610024
TET1 CD wt + OGT	67798	153600	0.441393	1.36603
TET1 CD wt + OGT + UDP-GlcNAc	199355	149450	1.33392	4.12824
TET1 CD wt replicate 3
	5hmC	Loading	5hmC/Loading	Relative 5hmC
TET1 CD wt	84808	183490	0.462194	1
TET1 CD wt + UDP-GlcNAc	41366	161576	0.256016	0.553914
TET1 CD wt + OGT	70327	118853	0.591714	1.28023
TET1 CD wt + OGT + UDP-GlcNAc	179953	101160	1.77889	3.8488
TET1 CD wt replicate 4
	5hmC	Loading	5hmC/Loading	Relative 5hmC
TET1 CD wt	75734	187437	0.40405	1
TET1 CD wt + UDP-GlcNAc	24220	174353	0.138914	0.343803
TET1 CD wt + OGT	117509	171515	0.685124	1.69564
TET1 CD wt replicate 5
	5hmC	Loading	5hmC/Loading	Relative 5hmC
TET1 CD wt	70167	177400	0.39553	1
TET1 CD wt + UDP-GlcNAc	56219	114884	0.489354	1.23721

## Sheet: B. TET1 D2018A
TET1 CD D2018A replicate 1								Relative 5hmC 1	Relative 5hmC 2	Relative 5hmC 3	Relative 5hmC 4	Average	StDev
	5hmC	Loading	5hmC/Loading	Relative 5hmC			TET1 CD D2018A	1	1	1	1	1	0
TET1 CD D2018A	179115	190476	0.940355	1			TET1 CD D2018A + UDP-GlcNAc	0.59	1.14	1.11	0.29	0.7825	0.414196
TET1 CD D2018A + UDP-GlcNAc	99788	178449	0.559196	0.594665			TET1 CD D2018A + OGT	0.83	1.14	1.22	0.87	1.015	0.193993
TET1 CD D2018A + OGT	124397	159017	0.782287	0.831907			TET1 CD D2018A + OGT + UDP-GlcNAc	1.04	0.98	0.88	0.81	0.9275	0.102429
TET1 CD D2018A + OGT + UDP-GlcNAc	146250	149828	0.976119	1.03803
TET1 CD D2018A replicate 2
	5hmC	Loading	5hmC/Loading	Relative 5hmC
TET1 CD D2018A	162076	140060	1.15719	1
TET1 CD D2018A + UDP-GlcNAc	177026	134510	1.31608	1.13731
TET1 CD D2018A + OGT	171802	129740	1.3242	1.14433
TET1 CD D2018A + OGT + UDP-GlcNAc	157756	139024	1.13474	0.980599
TET1 CD D2018A replicate 3
	5hmC	Loading	5hmC/Loading	Relative 5hmC
TET1 CD D2018A	176804	158114	1.11821	1
TET1 CD D2018A + UDP-GlcNAc	171856	138167	1.24383	1.11234
TET1 CD D2018A + OGT	191052	139880	1.36583	1.22145
TET1 CD D2018A + OGT + UDP-GlcNAc	168518	171929	0.98016	0.876547
TET1 CD D2018A replicate 4
	5hmC	Loading	5hmC/Loading	Relative 5hmC
TET1 CD D2018A	183207	129677	1.41279	1
TET1 CD D2018A + UDP-GlcNAc	78166	188518	0.414634	0.293485
TET1 CD D2018A + OGT	170164	137995	1.23312	0.872821
TET1 CD D2018A + OGT + UDP-GlcNAc	156219	136210	1.1469	0.811794
