# Supplementary material for: OGT binds a conserved C-terminal domain of TET1 to regulate TET1 activity and function in development
Source: eLife. 2018 Oct 16;7:e34870. doi: 10.7554/eLife.34870 (PMC6214653; doi:10.7554/eLife.34870)
Supplement: Figure 5—source data 1. [file elife-34870-fig5-data1.xlsx]

## Sheet: Sheet1
Raw data siblings
			uninjected			wt-tet1			OGT mutant tet1
experiment	genotype	total	runx1 high	% high	total	runx1 high	% high	total	runx1 high	% high
1	sibling	29	27	0.931034	28	26	0.928571	28	25	0.892857
2	sibling	39	38	0.974359	58	57	0.982759	56	53	0.946429
3	sibling	18	16	0.888889	54	50	0.925926	53	49	0.924528
4	sibling	20	20	1	22	21	0.954545	35	32	0.914286
5	sibling	26	25	0.961538	24	24	1	31	29	0.935484
	Average	26.4	25.2	0.951164	37.2	35.6	0.95836	40.6	37.6	0.922717
	SD	8.32466	8.34865	0.0427609	17.3551	16.6223	0.0327226	12.973	12.5618	0.0205622
	SE	3.7229	3.73363	0.0191233	7.76144	7.43371	0.014634	5.80172	5.61783	0.00919568
statistics:
student t test:		p value	difference between means		95% confidence interval		Significant	Summary
uninjected vs wt-tet1		0.7404	-0.8000 ± 2.332		-6.178 to 4.578		No	ns
wt-tet1 vs OGT mutant		0.0744	3.600 ± 1.755		-0.4470 to 7.647		No	ns
uninjected vs OGT mutant		0.2298	2.800 ± 2.154		-2.167 to 7.767		No	ns
2 way ANOVA
Number of families		1
Number of comparisons per family		3
Alpha		0.05
Tukey's multiple comparisons test
		Mean Diff.	95% CI of diff.		Significant?	Summary
uninjected vs. wt		-0.8	-5.208 to 3.608		No	ns
uninjected vs. muant		2.8	-1.608 to 7.208		No	ns
wt vs. muant		3.6	-0.8083 to 8.008		No	ns
Test details		Mean 1	Mean 2	Mean Diff.	SE of diff.	N1	N2	q	DF
uninjected vs. wt		95	95.8	-0.8	1.543	5	5	0.7334	8
uninjected vs. muant		95	92.2	2.8	1.543	5	5	2.567	8
wt vs. muant		95.8	92.2	3.6	1.543	5	5	3.3	8
Raw data tet2/3 double mutants
			uninjected			wt-tet1			OGT mutant tet1
experiment	genotype	total	runx1 high	% high	total	runx1 high	% high	total	runx1 high	% high
1	tet2/3 DM	17	5	0.294118	6	4	0.666667	9	3	0.333333
2	tet2/3 DM	22	4	0.181818	17	9	0.529412	15	5	0.333333
3	tet2/3 DM	10	4	0.4	8	4	0.5	12	4	0.333333
4	tet2/3 DM	6	2	0.333333	6	4	0.666667	16	5	0.3125
5	tet2/3 DM	20	6	0.3	4	3	0.75	14	8	0.571429
	Average	15	4.2	0.301854	8.2	4.8	0.622549	13.2	5	0.376786
	SD	6.78233	1.48324	0.0792078	5.11859	2.38747	0.104677	2.77489	1.87083	0.109182
	SE	3.03315	0.663325	0.0354228	2.2891	1.06771	0.0468131	1.24097	0.83666	0.0488277
statistics:
student t test:		p value	difference betwee means		95% confidence interval		Significant	Summary
uninjected vs wt-tet1		0.0006	-32.40 ± 5.904		-46.02 to -18.78		Yes	***
uninjected vs OGT mutant		0.2576	7.400 ± 6.071		-6.6 to 21.40		No	ns
wt-tet1 vs OGT mutant		0.0063	25.00 ± 6.806		9.306 to 40.69		Yes	**
2 way ANOVA
Number of families		1
Number of comparisons per family		3
Alpha		0.05
Tukey's multiple comparisons test
		Mean Diff.	95% CI of diff.		Significant?	Summary
uninjected vs. wt		-32.4	-48.01 to -16.79		Yes	***
uninjected vs. mutant		-7.4	-23.01 to 8.209		No	ns
wt vs. mutant		25	9.391 to 40.61		Yes	**
Test details		Mean 1	Mean 2	Mean Diff.	SE of diff.	N1	N2	q	DF
uninjected vs. wt		30	62.4	-32.4	5.463	5	5	8.388	8
uninjected vs. mutant		30	37.4	-7.4	5.463	5	5	1.916	8
wt vs. mutant		62.4	37.4	25	5.463	5	5	6.472	8
