# Supplementary material for: OGT binds a conserved C-terminal domain of TET1 to regulate TET1 activity and function in development
Source: eLife. 2018 Oct 16;7:e34870. doi: 10.7554/eLife.34870 (PMC6214653; doi:10.7554/eLife.34870)
Supplement: Figure 6—figure supplement 2—source data 1. [file elife-34870-fig6-figsupp2-data1.xlsx]

## Sheet: Sheet1
WT
Hours	TET2 Signal	Tubulin Signal	TET2/Tubulin	TET2 Signal normalized to 0hr
0	52293	109333	0.478291	1
2	45166	100164	0.45092	0.942774
6	40597	88928	0.456515	0.954472
10	28178	54473	0.517284	1.08153
D2018A
Hours	TET2	Tubulin	TET2/Tubulin	TET2 Signal normalized to 0hr
0	143799	64198	2.23993	1
2	111649	44425	2.5132	1.122
6	126701	54498	2.32487	1.03792
10	115325	62566	1.84325	0.822907
