# Supplementary material for: OGT binds a conserved C-terminal domain of TET1 to regulate TET1 activity and function in development
Source: eLife. 2018 Oct 16;7:e34870. doi: 10.7554/eLife.34870 (PMC6214653; doi:10.7554/eLife.34870)
Supplement: Figure 6—figure supplement 3—source data 1. [file elife-34870-fig6-figsupp3-data1.xlsx]

## Sheet: Sheet1
Log2 fold change vs. wild type
	Wild type	LF2	wt3 het	wt4 het	D2018A	DA2 het
Peg10	0	2.21	0.217	-0.067	1.89	1.48
Lefty1	0	1.01	0.233	-0.057	1.52	0.42
Lefty2	0	1.3	0.135	-0.175	1.92	0.595
StDev log2 fold change vs. wild type
	Wild type	LF2	wt3 het	wt4 het	D2018A	DA2 het
Peg10	0	0.528	0.224	0.283	0.416	0.43
Lefty1	0	0.648	0.365	0.372	0.397	0.646
Lefty2	0	0.504	0.248	0.264	0.267	0.605

## Sheet: For paper
1 + △△Ct
	WT - WT	WT - WT het-1	WT - WT het-2	WT - D2018A
Peg10	1	1.217	0.933	2.89
Lefty1	1	1.233	0.943	2.52
Lefty2	1	1.135	0.825	2.92
StDev △△Ct
	WT - WT	WT - WT het-1	WT - WT het-2	WT - D2018A
Peg10	0	0.224	0.283	0.416
Lefty1	0	0.365	0.372	0.397
Lefty2	0	0.248	0.264	0.267
