# Supplementary material for: OGT binds a conserved C-terminal domain of TET1 to regulate TET1 activity and function in development
Source: eLife. 2018 Oct 16;7:e34870. doi: 10.7554/eLife.34870 (PMC6214653; doi:10.7554/eLife.34870)
Supplement: Figure 6—figure supplement 3—source data 2. [file elife-34870-fig6-figsupp3-data2.xlsx]

## Sheet: Sheet1
	Standard Curve
		dC	280	dG	264
	sample	pmol	area	pmol	area
	low 7.5	182.3	115.85	133.3	109.482
	low 15	364.5	235.231	266.6	219.711
	low 45	1093.5	706.453	799.7	664.016
	high 10	2430.1	1598.27	1777.2	1509.97
	high 20	4860.2	3218.55	3554.4	3032.55
	high 40	9720.4	6469.62	7108.8	6041.57
		264 nm				280 nm					% of dC
	Sample	Area dG	pmol dG/injection	pmol/sample		Area dC	pmol dC/injection	pmol/sample		Sample	mC
	WT-1	513.539	610.487	1220.97		411.439	639.133	1278.27		WT-1	4.05699
	WT-2	579.31	687.727	1375.45		460.598	712.89	1425.78		WT-2	3.87758
	WT het1-1	595.611	706.872	1413.74		475.175	734.761	1469.52		WT het1-1	4.04648
	WT het1-2	547.659	650.556	1301.11		438.719	680.063	1360.13		WT het1-2	4.07184
	WT het2-1	614.511	729.068	1458.14		488.967	755.454	1510.91		WT het2-1	4.09938
	WT het2-2	634.216	752.209	1504.42		510.61	787.926	1575.85		WT het2-2	3.89581
	D2018A-1	554.646	658.762	1317.52		445.138	689.694	1379.39		D2018A-1	3.28175
	D2018A-2	610.921	724.851	1449.7		496.319	766.485	1532.97		D2018A-2	2.92323
		% of dC
		Average mC	StDev mC
	WT	3.96729	0.12686
	WT het1	4.05916	0.0179321
	WT het2	3.9976	0.143943
	D2018A	3.10249	0.253512
		Unpaired t-test
		mC p-value
	WT vs. WT het1	0.417
	WT vs. WT het2	0.844
	WT het1 vs. WT het2	0.609
	WT vs. D2018A	0.0498
	WT het1 vs. D2018A	0.0335
	WT het2 vs. D2018A	0.0492
