# Supplementary material for: OGT binds a conserved C-terminal domain of TET1 to regulate TET1 activity and function in development
Source: eLife. 2018 Oct 16;7:e34870. doi: 10.7554/eLife.34870 (PMC6214653; doi:10.7554/eLife.34870)
Supplement: Figure 6—source data 1. [file elife-34870-fig6-data1.xlsx]

## Sheet: Sheet1
DA vs. wt
	qPCR △△Ct	qPCR StDev △△Ct	Log2 FC RNAseq
Peg10	1.84	0.49	2.02
Slc38a4	-3.29	1.27	-2.52
Lefty1	1.52	0.4	1.87
Lefty2	1.92	0.27	1.95
Tet2	-0.382	0.558	0.093
