# Supplementary material for: OGT binds a conserved C-terminal domain of TET1 to regulate TET1 activity and function in development
Source: eLife. 2018 Oct 16;7:e34870. doi: 10.7554/eLife.34870 (PMC6214653; doi:10.7554/eLife.34870)
Supplement: Figure 6—source data 2. [file elife-34870-fig6-data2.xlsx]

## Sheet: Sheet1
	Standard Curve
		dC	280	dG	264
	sample	pmol	area	pmol	area
	low 7.5	182.3	115.85	133.3	109.482
	low 15	364.5	235.231	266.6	219.711
	low 45	1093.5	706.453	799.7	664.016
	high 10	2430.1	1598.27	1777.2	1509.97
	high 20	4860.2	3218.55	3554.4	3032.55
	high 40	9720.4	6469.62	7108.8	6041.57
		264 nm				280 nm					% of dC
	Sample	Area dG	pmol dG/injection	pmol/sample		Area dC	pmol dC/injection	pmol/sample		Sample	mC	hmC
	WT-1	513.539	610.487	1220.97		411.439	639.133	1278.27		WT-1	4.05699	0.051446
	WT-2	579.31	687.727	1375.45		460.598	712.89	1425.78		WT-2	3.87758	0.0499698
	D2018A-1	554.646	658.762	1317.52		445.138	689.694	1379.39		D2018A-1	3.28175	0.0439438
	D2018A-2	610.921	724.851	1449.7		496.319	766.485	1532.97		D2018A-2	2.92323	0.0485914
		% of dC
		Average mC	StDev mC	Average hmC	StDev hmC
	WT	3.96729	0.12686	0.0507079	0.00104381
	D2018A	3.10249	0.253512	0.0462676	0.00328639
		WT vs. D2018A unpaired t-test
		mC p-value	hmC p-value
		0.0498	0.21
