# Supplementary material for: OGT binds a conserved C-terminal domain of TET1 to regulate TET1 activity and function in development
Source: eLife. 2018 Oct 16;7:e34870. doi: 10.7554/eLife.34870 (PMC6214653; doi:10.7554/eLife.34870)
Supplement: Supplementary file 1. [file elife-34870-supp1.xlsx]

## Sheet: Sheet1
	name	description	biotype	chromosome	strand	start	stop	baseMean	DAvsWTlog2FoldChange	lfcSE	stat	pvalue	padj
ENSMUSG00000032606	Nicn1	nicolin 1 [Source:MGI Symbol;Acc:MGI:1913507]	protein_coding	9	+	108290429	108296498	291.165	7.97252	0.562577	-14.1714	1.3768e-45	1.61879e-42
ENSMUSG00000032607	Amt	aminomethyltransferase [Source:MGI Symbol;Acc:MGI:3646700]	protein_coding	9	+	108296853	108302302	469.832	7.59144	0.366137	-20.7339	1.71415e-95	5.24014e-92
ENSMUSG00000057719	Sh3rf2	SH3 domain containing ring finger 2 [Source:MGI Symbol;Acc:MGI:2444628]	protein_coding	18	+	42053667	42158960	6.7869	6.21436	1.41577	-4.38938	1.13672e-05	0.000358243
ENSMUSG00000039461	Tcta	T cell leukemia translocation altered gene [Source:MGI Symbol;Acc:MGI:1918829]	protein_coding	9	-	108302958	108306160	20.7326	5.43043	1.14063	-4.76089	1.92742e-06	7.2563e-05
ENSMUSG00000075270	Pde11a	phosphodiesterase 11A [Source:MGI Symbol;Acc:MGI:3036251]	protein_coding	2	-	75989141	76338774	4.54756	5.26177	1.68315	-3.12615	0.00177109	0.0251493
ENSMUSG00000068327	Tlx2	T cell leukemia, homeobox 2 [Source:MGI Symbol;Acc:MGI:1350935]	protein_coding	6	-	83068324	83070293	2.3215	5.14935	1.76337	-2.92018	0.00349834	0.041906
ENSMUSG00000095687	Rnaset2a	ribonuclease T2A [Source:MGI Symbol;Acc:MGI:1915445]	protein_coding	17	-	8128610	8148097	3.51847	5.11097	1.55483	-3.28715	0.00101206	0.0160972
ENSMUSG00000047636	Cdcp2	CUB domain containing protein 2 [Source:MGI Symbol;Acc:MGI:3045328]	protein_coding	4	+	107096891	107113125	4.93229	4.8108	1.4416	-3.33713	0.000846487	0.0139323
ENSMUSG00000086617	Gm11635	predicted gene 11635 [Source:MGI Symbol;Acc:MGI:3650265]	lincRNA	11	+	101610614	101615956	13.0624	4.64664	1.16605	-3.98494	6.74966e-05	0.0016507
ENSMUSG00000042386	Tex13b	testis expressed 13B [Source:MGI Symbol;Acc:MGI:1890544]	protein_coding	X	-	140808307	140813433	7.46074	4.6046	1.1737	-3.92313	8.74058e-05	0.00206811
ENSMUSG00000105636	Gm43625	predicted gene 43625 [Source:MGI Symbol;Acc:MGI:5663762]	lincRNA	5	-	146203251	146204789	4.55049	4.54369	1.47274	-3.0852	0.00203417	0.0277441
ENSMUSG00000071347	C1qtnf9	C1q and tumor necrosis factor related protein 9 [Source:MGI Symbol;Acc:MGI:3045252]	protein_coding	14	+	60768134	60780869	18.4503	4.44297	0.786972	-5.64565	1.64558e-08	9.01528e-07
ENSMUSG00000034796	Cpne7	copine VII [Source:MGI Symbol;Acc:MGI:2142747]	protein_coding	8	+	123117374	123135182	12.5156	4.39474	1.18827	-3.69843	0.000216935	0.00452366
ENSMUSG00000063011	Msln	mesothelin [Source:MGI Symbol;Acc:MGI:1888992]	protein_coding	17	-	25748614	25754327	204.677	4.22227	0.210046	-20.1016	7.14086e-90	1.81913e-86
ENSMUSG00000009545	Kcnq1	potassium voltage-gated channel, subfamily Q, member 1 [Source:MGI Symbol;Acc:MGI:108083]	protein_coding	7	+	143106362	143427042	10.3471	4.07364	1.33552	-3.05024	0.00228661	0.0304776
ENSMUSG00000026414	Tnnt2	troponin T2, cardiac [Source:MGI Symbol;Acc:MGI:104597]	protein_coding	1	+	135836354	135852260	10.4071	4.05645	1.33374	-3.04142	0.00235469	0.0312697
ENSMUSG00000026452	Syt2	synaptotagmin II [Source:MGI Symbol;Acc:MGI:99666]	protein_coding	1	+	134646677	134762593	5.51163	4.04938	1.41655	-2.85863	0.00425481	0.04912
ENSMUSG00000023959	Clic5	chloride intracellular channel 5 [Source:MGI Symbol;Acc:MGI:1917912]	protein_coding	17	+	44188572	44280168	9.71413	3.88851	1.06055	-3.66651	0.000245879	0.00500433
ENSMUSG00000044312	Neurog3	neurogenin 3 [Source:MGI Symbol;Acc:MGI:893591]	protein_coding	10	+	62133090	62134763	30.6622	3.67019	0.634251	-5.78664	7.18068e-09	4.21221e-07
ENSMUSG00000050439	Enthd1	ENTH domain containing 1 [Source:MGI Symbol;Acc:MGI:2686088]	protein_coding	15	-	80452240	80560470	12.6952	3.58852	1.19118	-3.01257	0.00259042	0.0334132
ENSMUSG00000039452	Snx22	sorting nexin 22 [Source:MGI Symbol;Acc:MGI:2685966]	protein_coding	9	-	66065176	66069719	8.17115	3.57955	1.0384	-3.44718	0.000566472	0.0100099
ENSMUSG00000041062	Mslnl	mesothelin-like [Source:MGI Symbol;Acc:MGI:3607710]	protein_coding	17	+	25736040	25748330	30.7287	3.29849	0.594756	-5.54595	2.92365e-08	1.55707e-06
ENSMUSG00000042510	AA986860	expressed sequence AA986860 [Source:MGI Symbol;Acc:MGI:2138143]	protein_coding	1	+	130731976	130744622	14.9708	3.24835	0.858801	-3.78242	0.000155312	0.00336252
ENSMUSG00000039376	Synpo2l	synaptopodin 2-like [Source:MGI Symbol;Acc:MGI:1916010]	protein_coding	14	-	20658946	20668354	26.257	3.15304	0.644938	-4.88891	1.01398e-06	4.02564e-05
ENSMUSG00000045246	Kcng4	potassium voltage-gated channel, subfamily G, member 4 [Source:MGI Symbol;Acc:MGI:1913983]	protein_coding	8	-	119623854	119635680	23.8677	3.12571	0.604852	-5.16773	2.36957e-07	1.07474e-05
ENSMUSG00000050138	Kcnk12	potassium channel, subfamily K, member 12 [Source:MGI Symbol;Acc:MGI:2684043]	protein_coding	17	-	87745837	87797994	7.5471	3.04168	0.901681	-3.37335	0.000742602	0.01257
ENSMUSG00000035557	Krt17	keratin 17 [Source:MGI Symbol;Acc:MGI:96691]	protein_coding	11	-	100256217	100261029	319.743	2.96217	0.182237	-16.2545	2.07716e-59	3.96868e-56
ENSMUSG00000085501	Gm11772	predicted gene 11772 [Source:MGI Symbol;Acc:MGI:3649468]	antisense_RNA	11	-	120235234	120236122	16.2542	2.92259	0.81067	-3.60516	0.000311966	0.00609769
ENSMUSG00000007815	Rhoa	ras homolog family member A [Source:MGI Symbol;Acc:MGI:1096342]	protein_coding	9	+	108306129	108337934	1023.28	2.8004	0.112471	-24.8988	7.6687e-137	3.9072e-133
ENSMUSG00000025519	Tktl2	transketolase-like 2 [Source:MGI Symbol;Acc:MGI:1921669]	protein_coding	8	+	66511756	66518335	10.0078	2.54802	0.844929	-3.01566	0.00256418	0.0332567
ENSMUSG00000053797	Krt16	keratin 16 [Source:MGI Symbol;Acc:MGI:96690]	protein_coding	11	-	100246091	100248902	22.2411	2.37768	0.519911	-4.57324	4.80228e-06	0.000165322
ENSMUSG00000028444	Cntfr	ciliary neurotrophic factor receptor [Source:MGI Symbol;Acc:MGI:99605]	protein_coding	4	-	41657498	41697089	218.577	2.37662	0.201595	-11.7891	4.44525e-32	2.95416e-29
ENSMUSG00000030930	Chst15	carbohydrate (N-acetylgalactosamine 4-sulfate 6-O) sulfotransferase 15 [Source:MGI Symbol;Acc:MGI:1924840]	protein_coding	7	-	132235780	132317228	15.4758	2.36531	0.601102	-3.93495	8.32138e-05	0.00198428
ENSMUSG00000025739	Gng13	guanine nucleotide binding protein (G protein), gamma 13 [Source:MGI Symbol;Acc:MGI:1925616]	protein_coding	17	+	25717171	25719406	71.8074	2.35324	0.289375	-8.13213	4.21811e-16	7.86266e-14
ENSMUSG00000086924	Gm11766	predicted gene 11766 [Source:MGI Symbol;Acc:MGI:3650673]	lincRNA	11	+	119938511	119942074	10.4064	2.25179	0.75191	-2.99476	0.0027466	0.0350139
ENSMUSG00000053654	Krt42	keratin 42 [Source:MGI Symbol;Acc:MGI:1915489]	protein_coding	11	-	100262882	100269871	923.649	2.14301	0.152489	-14.0535	7.32851e-45	8.00117e-42
ENSMUSG00000032841	Prr5l	proline rich 5 like [Source:MGI Symbol;Acc:MGI:1919696]	protein_coding	2	-	101714285	101883027	36.0908	2.07282	0.428788	-4.83414	1.33724e-06	5.20478e-05
ENSMUSG00000079584	Gm364	predicted gene 364 [Source:MGI Symbol;Acc:MGI:2685210]	protein_coding	X	+	57409154	57488767	117.682	2.04959	0.516728	-3.96649	7.29395e-05	0.00176405
ENSMUSG00000092035	Peg10	paternally expressed 10 [Source:MGI Symbol;Acc:MGI:2157785]	protein_coding	6	+	4747306	4760517	4764.81	2.01714	0.0832282	-24.2363	9.2201e-130	3.52323e-126
ENSMUSG00000061086	Myl4	myosin, light polypeptide 4 [Source:MGI Symbol;Acc:MGI:97267]	protein_coding	11	+	104550663	104595753	215.126	1.99934	0.215685	-9.26969	1.86685e-20	5.09551e-18
ENSMUSG00000066652	Lefty2	left-right determination factor 2 [Source:MGI Symbol;Acc:MGI:2443573]	protein_coding	1	+	180893108	180899103	252.457	1.95032	0.17966	-10.8556	1.87557e-27	9.88554e-25
ENSMUSG00000030315	Vgll4	vestigial like family member 4 [Source:MGI Symbol;Acc:MGI:2652840]	protein_coding	6	-	114860628	114969994	178.853	1.93741	0.202886	-9.54929	1.30594e-21	3.99227e-19
ENSMUSG00000044041	Krt13	keratin 13 [Source:MGI Symbol;Acc:MGI:101925]	protein_coding	11	-	100117327	100121566	13.8448	1.93029	0.581907	-3.31718	0.000909318	0.0147704
ENSMUSG00000028717	Tal1	T cell acute lymphocytic leukemia 1 [Source:MGI Symbol;Acc:MGI:98480]	protein_coding	4	+	115056426	115071755	18.3303	1.92773	0.568128	-3.39312	0.000691005	0.0118674
ENSMUSG00000032060	Cryab	crystallin, alpha B [Source:MGI Symbol;Acc:MGI:88516]	protein_coding	9	+	50751325	50756636	52.918	1.9005	0.418796	-4.53801	5.67881e-06	0.000191613
ENSMUSG00000103115	Gm37584	predicted gene, 37584 [Source:MGI Symbol;Acc:MGI:5610812]	lincRNA	3	-	88526066	88527355	24.1662	1.89002	0.608669	-3.10517	0.00190172	0.0264493
ENSMUSG00000038793	Lefty1	left right determination factor 1 [Source:MGI Symbol;Acc:MGI:107405]	protein_coding	1	+	180935022	180938400	99.494	1.86594	0.335721	-5.558	2.72881e-08	1.45839e-06
ENSMUSG00000029135	Fosl2	fos-like antigen 2 [Source:MGI Symbol;Acc:MGI:102858]	protein_coding	5	+	32135801	32157842	161.324	1.82319	0.220152	-8.28151	1.21627e-16	2.44614e-14
ENSMUSG00000031688	Pou4f2	POU domain, class 4, transcription factor 2 [Source:MGI Symbol;Acc:MGI:102524]	protein_coding	8	-	78433010	78436645	130.51	1.81983	0.249734	-7.28708	3.16751e-13	3.66784e-11
ENSMUSG00000040663	Clcf1	cardiotrophin-like cytokine factor 1 [Source:MGI Symbol;Acc:MGI:1930088]	protein_coding	19	+	4214238	4223490	26.8019	1.80996	0.457342	-3.95757	7.57147e-05	0.00181856
ENSMUSG00000037005	Xpnpep2	X-prolyl aminopeptidase (aminopeptidase P) 2, membrane-bound [Source:MGI Symbol;Acc:MGI:2180001]	protein_coding	X	+	48108725	48136981	29.298	1.80253	0.527128	-3.41953	0.000627283	0.0109452
ENSMUSG00000002881	Nab1	Ngfi-A binding protein 1 [Source:MGI Symbol;Acc:MGI:107564]	protein_coding	1	-	52457294	52500679	42.6315	1.78722	0.369778	-4.83322	1.34344e-06	5.21178e-05
ENSMUSG00000052180	Serpinb6c	serine (or cysteine) peptidase inhibitor, clade B, member 6c [Source:MGI Symbol;Acc:MGI:2145481]	protein_coding	13	-	33879816	33905708	82.4481	1.7809	0.256091	-6.95419	3.54599e-12	3.57072e-10
ENSMUSG00000021792	Fam213a	family with sequence similarity 213, member A [Source:MGI Symbol;Acc:MGI:1917814]	protein_coding	14	-	40993740	41013788	23.6971	1.76175	0.597056	-2.95073	0.00317028	0.0388594
ENSMUSG00000026826	Nr4a2	nuclear receptor subfamily 4, group A, member 2 [Source:MGI Symbol;Acc:MGI:1352456]	protein_coding	2	-	57106830	57124003	26.4776	1.74679	0.45943	-3.80209	0.000143479	0.00313437
ENSMUSG00000073408	Dpcr1	diffuse panbronchiolitis critical region 1 (human) [Source:MGI Symbol;Acc:MGI:2685476]	protein_coding	17	-	35635752	35643695	20.6968	1.73616	0.561797	-3.09036	0.00199913	0.0273805
ENSMUSG00000060260	Pwwp2b	PWWP domain containing 2B [Source:MGI Symbol;Acc:MGI:2142008]	protein_coding	7	+	139248482	139269903	164.76	1.72581	0.24823	-6.95246	3.58958e-12	3.57072e-10
ENSMUSG00000023826	Park2	Parkinson disease (autosomal recessive, juvenile) 2, parkin [Source:MGI Symbol;Acc:MGI:1355296]	protein_coding	17	+	10840384	12063361	62.7152	1.71846	0.296697	-5.79196	6.95706e-09	4.13769e-07
ENSMUSG00000030518	Fam189a1	family with sequence similarity 189, member A1 [Source:MGI Symbol;Acc:MGI:1917888]	protein_coding	7	-	64756091	65156570	92.2156	1.70508	0.339099	-5.02826	4.94952e-07	2.08065e-05
ENSMUSG00000037813	D630003M21Rik	RIKEN cDNA D630003M21 gene [Source:MGI Symbol;Acc:MGI:3606579]	protein_coding	2	-	158182533	158229222	20.9739	1.67772	0.549557	-3.05285	0.00226679	0.0303573
ENSMUSG00000030587	2200002D01Rik	RIKEN cDNA 2200002D01 gene [Source:MGI Symbol;Acc:MGI:1919525]	protein_coding	7	-	29246561	29248466	47.7724	1.63336	0.362044	-4.51151	6.43673e-06	0.000214347
ENSMUSG00000038086	Hspb2	heat shock protein 2 [Source:MGI Symbol;Acc:MGI:1916503]	protein_coding	9	-	50751078	50752354	53.1764	1.62912	0.367715	-4.43039	9.40611e-06	0.000303959
ENSMUSG00000040867	Begain	brain-enriched guanylate kinase-associated [Source:MGI Symbol;Acc:MGI:3044626]	protein_coding	12	-	109032187	109068217	71.0301	1.62151	0.263637	-6.15053	7.7224e-10	5.54164e-08
ENSMUSG00000006784	Ttc25	tetratricopeptide repeat domain 25 [Source:MGI Symbol;Acc:MGI:1921657]	protein_coding	11	+	100545607	100572568	121.976	1.6184	0.237499	-6.81434	9.47003e-12	8.88033e-10
ENSMUSG00000099338	2810030D12Rik	RIKEN cDNA 2810030D12 gene [Source:MGI Symbol;Acc:MGI:1925585]	bidirectional_promoter_lncRNA	8	+	13200720	13207714	27.4269	1.61827	0.513276	-3.15282	0.00161701	0.0235167
ENSMUSG00000022218	Tgm1	transglutaminase 1, K polypeptide [Source:MGI Symbol;Acc:MGI:98730]	protein_coding	14	-	55700009	55713492	909.711	1.58881	0.0993264	-15.9958	1.3666e-57	2.32094e-54
ENSMUSG00000002980	Bcam	basal cell adhesion molecule [Source:MGI Symbol;Acc:MGI:1929940]	protein_coding	7	-	19756131	19771016	1225.28	1.58127	0.113411	-13.9428	3.48107e-44	3.32551e-41
ENSMUSG00000070708	Gtsf1l	gametocyte specific factor 1-like [Source:MGI Symbol;Acc:MGI:1915486]	protein_coding	2	-	163087034	163087855	188.336	1.57907	0.26094	-6.05146	1.43536e-09	9.75085e-08
ENSMUSG00000024395	Lims2	LIM and senescent cell antigen like domains 2 [Source:MGI Symbol;Acc:MGI:2385067]	protein_coding	18	+	31931325	31958619	448.071	1.56428	0.148446	-10.5377	5.79116e-26	2.60347e-23
ENSMUSG00000051243	Islr2	immunoglobulin superfamily containing leucine-rich repeat 2 [Source:MGI Symbol;Acc:MGI:2444277]	protein_coding	9	-	58196297	58204319	393.596	1.56119	0.149102	-10.4707	1.17801e-25	5.00164e-23
ENSMUSG00000044646	Zbtb7c	zinc finger and BTB domain containing 7C [Source:MGI Symbol;Acc:MGI:2443302]	protein_coding	18	+	75820178	76148561	438.655	1.55808	0.13193	-11.8099	3.47031e-32	2.41108e-29
ENSMUSG00000022505	Emp2	epithelial membrane protein 2 [Source:MGI Symbol;Acc:MGI:1098726]	protein_coding	16	-	10281749	10313968	283.481	1.54544	0.213728	-7.2309	4.79807e-13	5.31438e-11
ENSMUSG00000097023	Mir9-3hg	Mir9-3 host gene [Source:MGI Symbol;Acc:MGI:2142071]	lincRNA	7	+	79500026	79534403	47.4658	1.52925	0.42505	-3.59782	0.000320895	0.00624825
ENSMUSG00000051331	Cacna1c	calcium channel, voltage-dependent, L type, alpha 1C subunit [Source:MGI Symbol;Acc:MGI:103013]	protein_coding	6	-	118587240	119196418	163.535	1.52743	0.279014	-5.47437	4.39065e-08	2.25205e-06
ENSMUSG00000046846	Spesp1	sperm equatorial segment protein 1 [Source:MGI Symbol;Acc:MGI:1913962]	protein_coding	9	-	62270729	62282208	25.3029	1.50819	0.488594	-3.08679	0.00202333	0.0276515
ENSMUSG00000006205	Htra1	HtrA serine peptidase 1 [Source:MGI Symbol;Acc:MGI:1929076]	protein_coding	7	+	130936111	130985660	107.414	1.50173	0.23855	-6.29526	3.06883e-10	2.33368e-08
ENSMUSG00000089984	Fbxo24	F-box protein 24 [Source:MGI Symbol;Acc:MGI:1918426]	protein_coding	5	-	137612503	137629002	30.5814	1.4875	0.469696	-3.16693	0.00154055	0.0226708
ENSMUSG00000103037	Pcdhgb1	protocadherin gamma subfamily B, 1 [Source:MGI Symbol;Acc:MGI:1935169]	protein_coding	18	+	37680233	37841870	43.2669	1.47903	0.410799	-3.60037	0.00031776	0.00619511
ENSMUSG00000037686	Aspg	asparaginase [Source:MGI Symbol;Acc:MGI:2144822]	protein_coding	12	+	112106679	112127559	147.554	1.47657	0.191601	-7.70647	1.29347e-14	1.84773e-12
ENSMUSG00000030560	Ctsc	cathepsin C [Source:MGI Symbol;Acc:MGI:109553]	protein_coding	7	+	88278085	88310888	48.2823	1.47626	0.384077	-3.84365	0.000121219	0.0027328
ENSMUSG00000001025	S100a6	S100 calcium binding protein A6 (calcyclin) [Source:MGI Symbol;Acc:MGI:1339467]	protein_coding	3	+	90612882	90624181	243.503	1.47177	0.212339	-6.9312	4.17276e-12	4.03675e-10
ENSMUSG00000063897	DHRSX	dehydrogenase/reductase SDR family member on chromosome X homolog [Source:RefSeq peptide;Acc:NP_001028498]	protein_coding	GL456216.1	+	15881	36183	401.126	1.46424	0.189626	-7.72174	1.14748e-14	1.68647e-12
ENSMUSG00000026479	Lamc2	laminin, gamma 2 [Source:MGI Symbol;Acc:MGI:99913]	protein_coding	1	-	153122756	153186447	66.7072	1.45881	0.339214	-4.30057	1.7036e-05	0.000501726
ENSMUSG00000045319	Proser2	proline and serine rich 2 [Source:MGI Symbol;Acc:MGI:2442238]	protein_coding	2	-	6097607	6130211	70.9824	1.45857	0.333702	-4.37087	1.23754e-05	0.000383687
ENSMUSG00000027316	Gfra4	glial cell line derived neurotrophic factor family receptor alpha 4 [Source:MGI Symbol;Acc:MGI:1341873]	protein_coding	2	-	131039632	131043088	43.6533	1.45655	0.403268	-3.61187	0.000303998	0.0059725
ENSMUSG00000045629	Sh3tc2	SH3 domain and tetratricopeptide repeats 2 [Source:MGI Symbol;Acc:MGI:2444417]	protein_coding	18	+	61953075	62015715	34.6308	1.43624	0.414518	-3.46485	0.000530532	0.00946229
ENSMUSG00000067616	Klk11	kallikrein related-peptidase 11 [Source:MGI Symbol;Acc:MGI:1929977]	protein_coding	7	+	43774604	43779263	143.78	1.42351	0.222389	-6.40101	1.54353e-10	1.2483e-08
ENSMUSG00000025930	Msc	musculin [Source:MGI Symbol;Acc:MGI:1333884]	protein_coding	1	-	14753346	14755992	56.4055	1.41001	0.386696	-3.64631	0.000266028	0.00535032
ENSMUSG00000002274	Metrn	meteorin, glial cell differentiation regulator [Source:MGI Symbol;Acc:MGI:1917333]	protein_coding	17	-	25794571	25797136	121.537	1.40805	0.2283	-6.16756	6.93523e-10	5.00023e-08
ENSMUSG00000020681	Ace	angiotensin I converting enzyme (peptidyl-dipeptidase A) 1 [Source:MGI Symbol;Acc:MGI:87874]	protein_coding	11	+	105967945	105989964	199.653	1.37749	0.42188	-3.26513	0.00109414	0.0172056
ENSMUSG00000020077	Srgn	serglycin [Source:MGI Symbol;Acc:MGI:97756]	protein_coding	10	-	62493833	62527451	77.8101	1.36468	0.335497	-4.06765	4.74899e-05	0.00121588
ENSMUSG00000032440	Tgfbr2	transforming growth factor, beta receptor II [Source:MGI Symbol;Acc:MGI:98729]	protein_coding	9	-	116084293	116175360	115.559	1.35004	0.284169	-4.75083	2.02585e-06	7.58949e-05
ENSMUSG00000032548	Slco2a1	solute carrier organic anion transporter family, member 2a1 [Source:MGI Symbol;Acc:MGI:1346021]	protein_coding	9	+	102988712	103096002	62.8505	1.34735	0.38999	-3.45484	0.00055062	0.00975229
ENSMUSG00000054252	Fgfr3	fibroblast growth factor receptor 3 [Source:MGI Symbol;Acc:MGI:95524]	protein_coding	5	+	33721674	33737068	41.7254	1.33982	0.394451	-3.39666	0.000682138	0.0117548
ENSMUSG00000063109	Dgkeos	diacylglycerol kinase, epsilon, opposite strand [Source:MGI Symbol;Acc:MGI:3041185]	antisense_RNA	11	+	89064729	89069098	25.8159	1.33598	0.454599	-2.9388	0.00329488	0.0400654
ENSMUSG00000012123	Crybg2	crystallin beta-gamma domain containing 2 [Source:MGI Symbol;Acc:MGI:1334463]	protein_coding	4	+	134060815	134092504	866.852	1.32643	0.147631	-8.98482	2.59166e-19	6.60226e-17
ENSMUSG00000030402	Ppm1n	protein phosphatase, Mg2+/Mn2+ dependent, 1N (putative) [Source:MGI Symbol;Acc:MGI:2142330]	protein_coding	7	-	19276805	19280064	37.6199	1.30115	0.409951	-3.17391	0.00150403	0.0222331
ENSMUSG00000004631	Sgce	sarcoglycan, epsilon [Source:MGI Symbol;Acc:MGI:1329042]	protein_coding	6	-	4674350	4747207	159.385	1.28409	0.446993	-2.87272	0.00406951	0.0471946
ENSMUSG00000044456	Rin3	Ras and Rab interactor 3 [Source:MGI Symbol;Acc:MGI:2385708]	protein_coding	12	+	102283048	102390855	105.406	1.28372	0.286207	-4.48529	7.28148e-06	0.000240383
ENSMUSG00000045519	Zfp560	zinc finger protein 560 [Source:MGI Symbol;Acc:MGI:1915280]	protein_coding	9	-	20345136	20385177	45.4261	1.27911	0.407037	-3.14249	0.00167518	0.0240424
ENSMUSG00000015354	Pcolce2	procollagen C-endopeptidase enhancer 2 [Source:MGI Symbol;Acc:MGI:1923727]	protein_coding	9	+	95637601	95698096	81.4628	1.27381	0.238597	-5.33876	9.35845e-08	4.52671e-06
ENSMUSG00000024471	Myot	myotilin [Source:MGI Symbol;Acc:MGI:1889800]	protein_coding	18	+	44334074	44355724	38.052	1.25605	0.36524	-3.43898	0.0005839	0.0102703
ENSMUSG00000001348	Acp5	acid phosphatase 5, tartrate resistant [Source:MGI Symbol;Acc:MGI:87883]	protein_coding	9	-	22126727	22135711	110.099	1.25431	0.264523	-4.74179	2.11843e-06	7.89761e-05
ENSMUSG00000024782	Ak3	adenylate kinase 3 [Source:MGI Symbol;Acc:MGI:1860835]	protein_coding	19	-	29020833	29047961	142.672	1.24044	0.23735	-5.2262	1.73026e-07	8.08776e-06
ENSMUSG00000001240	Ramp2	receptor (calcitonin) activity modifying protein 2 [Source:MGI Symbol;Acc:MGI:1859650]	protein_coding	11	+	101246028	101259546	49.2772	1.23972	0.392931	-3.15506	0.00160465	0.0234036
ENSMUSG00000036492	Rnf39	ring finger protein 39 [Source:MGI Symbol;Acc:MGI:2156378]	protein_coding	17	+	36942918	36947986	42.6439	1.22511	0.392917	-3.11798	0.00182097	0.0256669
ENSMUSG00000005148	Klf5	Kruppel-like factor 5 [Source:MGI Symbol;Acc:MGI:1338056]	protein_coding	14	+	99298691	99313405	18061	1.22473	0.141421	-8.66017	4.71076e-18	1.14292e-15
ENSMUSG00000027820	Mme	membrane metallo endopeptidase [Source:MGI Symbol;Acc:MGI:97004]	protein_coding	3	+	63241537	63386030	635.559	1.22266	0.125743	-9.72349	2.39442e-22	7.78698e-20
ENSMUSG00000039137	Whrn	whirlin [Source:MGI Symbol;Acc:MGI:2682003]	protein_coding	4	-	63414910	63495991	588.298	1.21993	0.16231	-7.51601	5.64711e-14	7.57159e-12
ENSMUSG00000001506	Col1a1	collagen, type I, alpha 1 [Source:MGI Symbol;Acc:MGI:88467]	protein_coding	11	+	94936224	94953042	114.671	1.21341	0.237641	-5.10608	3.28916e-07	1.45303e-05
ENSMUSG00000037820	Tgm2	transglutaminase 2, C polypeptide [Source:MGI Symbol;Acc:MGI:98731]	protein_coding	2	-	158116402	158146436	1443.09	1.21269	0.110129	-11.0116	3.36121e-28	1.87942e-25
ENSMUSG00000022286	Grhl2	grainyhead-like 2 (Drosophila) [Source:MGI Symbol;Acc:MGI:2182543]	protein_coding	15	+	37233036	37363569	190.749	1.21161	0.214268	-5.65465	1.56169e-08	8.61747e-07
ENSMUSG00000062393	Dgkk	diacylglycerol kinase kappa [Source:MGI Symbol;Acc:MGI:3580254]	protein_coding	X	+	6779306	6948363	90.359	1.20887	0.229967	-5.25669	1.46668e-07	6.89789e-06
ENSMUSG00000063060	Sox7	SRY (sex determining region Y)-box 7 [Source:MGI Symbol;Acc:MGI:98369]	protein_coding	14	+	63943673	63950732	330.518	1.20865	0.12904	-9.36643	7.50242e-21	2.24852e-18
ENSMUSG00000037664	Cdkn1c	cyclin-dependent kinase inhibitor 1C (P57) [Source:MGI Symbol;Acc:MGI:104564]	protein_coding	7	-	143458339	143461050	50.6119	1.19079	0.398323	-2.9895	0.00279431	0.0353861
ENSMUSG00000108713	Gm33027	predicted gene, 33027 [Source:MGI Symbol;Acc:MGI:5592186]	lincRNA	7	-	129398102	129403090	50.8607	1.17748	0.384654	-3.06114	0.00220497	0.0297729
ENSMUSG00000046223	Plaur	plasminogen activator, urokinase receptor [Source:MGI Symbol;Acc:MGI:97612]	protein_coding	7	+	24462484	24475968	207.588	1.17193	0.181606	-6.45315	1.0955e-10	9.05124e-09
ENSMUSG00000025478	Dpysl4	dihydropyrimidinase-like 4 [Source:MGI Symbol;Acc:MGI:1349764]	protein_coding	7	+	139086001	139102704	283.829	1.15734	0.158393	-7.30671	2.7376e-13	3.21878e-11
ENSMUSG00000037679	Inf2	inverted formin, FH2 and WH2 domain containing [Source:MGI Symbol;Acc:MGI:1917685]	protein_coding	12	+	112588784	112615557	380.501	1.1504	0.185817	-6.19104	5.97668e-10	4.35017e-08
ENSMUSG00000019817	Plagl1	pleiomorphic adenoma gene-like 1 [Source:MGI Symbol;Acc:MGI:1100874]	protein_coding	10	+	13060504	13131694	245.781	1.14492	0.155146	-7.37963	1.58732e-13	1.9887e-11
ENSMUSG00000025738	Fbxl16	F-box and leucine-rich repeat protein 16 [Source:MGI Symbol;Acc:MGI:2448488]	protein_coding	17	+	25809085	25821244	466.158	1.13388	0.137749	-8.23151	1.84873e-16	3.57695e-14
ENSMUSG00000103749	Pcdhgb5	protocadherin gamma subfamily B, 5 [Source:MGI Symbol;Acc:MGI:1935196]	protein_coding	18	+	37731009	37841873	59.7508	1.13221	0.322532	-3.51037	0.000447489	0.0081524
ENSMUSG00000006931	P3h4	prolyl 3-hydroxylase family member 4 (non-enzymatic) [Source:MGI Symbol;Acc:MGI:1913430]	protein_coding	11	-	100408456	100414836	147.602	1.13135	0.204682	-5.52737	3.25067e-08	1.71925e-06
ENSMUSG00000034675	Dbn1	drebrin 1 [Source:MGI Symbol;Acc:MGI:1931838]	protein_coding	13	-	55473429	55488111	634.047	1.12822	0.13633	-8.27568	1.27721e-16	2.53534e-14
ENSMUSG00000023909	Paqr4	progestin and adipoQ receptor family member IV [Source:MGI Symbol;Acc:MGI:1923748]	protein_coding	17	-	23736186	23740330	52.3431	1.12519	0.333172	-3.3772	0.000732274	0.0124089
ENSMUSG00000047492	Inhbe	inhibin beta-E [Source:MGI Symbol;Acc:MGI:109269]	protein_coding	10	-	127348857	127354411	58.7918	1.12458	0.282149	-3.98577	6.7262e-05	0.0016476
ENSMUSG00000000530	Acvrl1	activin A receptor, type II-like 1 [Source:MGI Symbol;Acc:MGI:1338946]	protein_coding	15	+	101128522	101145336	80.246	1.12439	0.312923	-3.59317	0.000326677	0.00635275
ENSMUSG00000028063	Lmna	lamin A [Source:MGI Symbol;Acc:MGI:96794]	protein_coding	3	-	88480147	88509956	972.685	1.11938	0.12896	-8.68007	3.95532e-18	9.75114e-16
ENSMUSG00000032726	Bmp8a	bone morphogenetic protein 8a [Source:MGI Symbol;Acc:MGI:104515]	protein_coding	4	-	123312645	123343252	68.3288	1.11144	0.310105	-3.58408	0.000338265	0.00652002
ENSMUSG00000044317	Gpr4	G protein-coupled receptor 4 [Source:MGI Symbol;Acc:MGI:2441992]	protein_coding	7	+	19212538	19224174	509.553	1.10885	0.150198	-7.38256	1.5528e-13	1.96153e-11
ENSMUSG00000020032	Nuak1	NUAK family, SNF1-like kinase, 1 [Source:MGI Symbol;Acc:MGI:1925226]	protein_coding	10	-	84370905	84440597	542.779	1.10699	0.129028	-8.57945	9.53297e-18	2.20775e-15
ENSMUSG00000040972	Igsf21	immunoglobulin superfamily, member 21 [Source:MGI Symbol;Acc:MGI:2681842]	protein_coding	4	-	140026846	140246784	516.593	1.10685	0.151699	-7.29638	2.95622e-13	3.4493e-11
ENSMUSG00000041782	Lad1	ladinin [Source:MGI Symbol;Acc:MGI:109343]	protein_coding	1	+	135818598	135833342	404.717	1.10569	0.128663	-8.59366	8.42412e-18	1.98096e-15
ENSMUSG00000032334	Loxl1	lysyl oxidase-like 1 [Source:MGI Symbol;Acc:MGI:106096]	protein_coding	9	-	58287738	58313186	89.4634	1.1049	0.329394	-3.35433	0.00079556	0.0132463
ENSMUSG00000048240	Gng7	guanine nucleotide binding protein (G protein), gamma 7 [Source:MGI Symbol;Acc:MGI:95787]	protein_coding	10	-	80948624	81014945	58.4219	1.10127	0.311305	-3.53758	0.00040381	0.00749058
ENSMUSG00000086741	Gm15816	predicted gene 15816 [Source:MGI Symbol;Acc:MGI:3802114]	antisense_RNA	8	-	23138794	23149585	60.2004	1.10087	0.324715	-3.39026	0.000698252	0.011965
ENSMUSG00000022091	Sorbs3	sorbin and SH3 domain containing 3 [Source:MGI Symbol;Acc:MGI:700013]	protein_coding	14	-	70180468	70207637	516.445	1.07819	0.13945	-7.73171	1.06111e-14	1.59011e-12
ENSMUSG00000000184	Ccnd2	cyclin D2 [Source:MGI Symbol;Acc:MGI:88314]	protein_coding	6	-	127125162	127152193	358.375	1.07279	0.161664	-6.63595	3.22418e-11	2.86521e-09
ENSMUSG00000020275	Rel	reticuloendotheliosis oncogene [Source:MGI Symbol;Acc:MGI:97897]	protein_coding	11	-	23736847	23770970	265.402	1.06616	0.163908	-6.50464	7.78795e-11	6.4695e-09
ENSMUSG00000032062	2310030G06Rik	RIKEN cDNA 2310030G06 gene [Source:MGI Symbol;Acc:MGI:1914202]	protein_coding	9	-	50739691	50746536	105.483	1.06031	0.210484	-5.03747	4.71715e-07	2.01401e-05
ENSMUSG00000015652	Steap1	six transmembrane epithelial antigen of the prostate 1 [Source:MGI Symbol;Acc:MGI:1917608]	protein_coding	5	-	5736317	5749326	125.205	1.0588	0.284289	-3.72436	0.000195812	0.00411691
ENSMUSG00000014776	Nol3	nucleolar protein 3 (apoptosis repressor with CARD domain) [Source:MGI Symbol;Acc:MGI:1925938]	protein_coding	8	+	105276140	105281939	52.0573	1.05154	0.350907	-2.99664	0.00272972	0.034831
ENSMUSG00000020227	Irak3	interleukin-1 receptor-associated kinase 3 [Source:MGI Symbol;Acc:MGI:1921164]	protein_coding	10	-	120141648	120202130	536.889	1.0473	0.160913	-6.50846	7.59272e-11	6.34179e-09
ENSMUSG00000026483	Fam129a	family with sequence similarity 129, member A [Source:MGI Symbol;Acc:MGI:2137237]	protein_coding	1	+	151571186	151721939	569.952	1.04728	0.105036	-9.9707	2.0478e-23	7.6343e-21
ENSMUSG00000096014	Sox1	SRY (sex determining region Y)-box 1 [Source:MGI Symbol;Acc:MGI:98357]	protein_coding	8	+	12395295	12400126	198.952	1.04315	0.200108	-5.21295	1.85864e-07	8.66139e-06
ENSMUSG00000032531	Amotl2	angiomotin-like 2 [Source:MGI Symbol;Acc:MGI:1929286]	protein_coding	9	+	102716672	102733418	567.753	1.04262	0.120865	-8.62632	6.33577e-18	1.51316e-15
ENSMUSG00000052384	Nrros	negative regulator of reactive oxygen species [Source:MGI Symbol;Acc:MGI:2445095]	protein_coding	16	-	32142785	32165594	63.8944	1.0416	0.329183	-3.16421	0.00155506	0.0228329
ENSMUSG00000030339	Ltbr	lymphotoxin B receptor [Source:MGI Symbol;Acc:MGI:104875]	protein_coding	6	-	125306571	125313885	64.7853	1.03612	0.351696	-2.94608	0.0032183	0.0393849
ENSMUSG00000008090	Fgfrl1	fibroblast growth factor receptor-like 1 [Source:MGI Symbol;Acc:MGI:2150920]	protein_coding	5	+	108692382	108706924	67.5981	1.03291	0.317331	-3.255	0.00113393	0.0176858
ENSMUSG00000021054	Sgpp1	sphingosine-1-phosphate phosphatase 1 [Source:MGI Symbol;Acc:MGI:2135760]	protein_coding	12	-	75714249	75735729	116.496	1.03263	0.21226	-4.86494	1.1449e-06	4.48713e-05
ENSMUSG00000020419	Hormad2	HORMA domain containing 2 [Source:MGI Symbol;Acc:MGI:1923078]	protein_coding	11	-	4345814	4441105	224.774	1.02932	0.250122	-4.11527	3.86724e-05	0.001007
ENSMUSG00000031351	Zfp185	zinc finger protein 185 [Source:MGI Symbol;Acc:MGI:108095]	protein_coding	X	+	72987339	73031543	412.299	1.0249	0.130955	-7.82635	5.02256e-15	7.99686e-13
ENSMUSG00000095562	Gm21887	predicted gene, 21887 [Source:MGI Symbol;Acc:MGI:5434051]	protein_coding	X	+	170009659	170019281	88.6685	1.0248	0.3022	-3.39113	0.000696041	0.0119405
ENSMUSG00000057000	Nxf3	nuclear RNA export factor 3 [Source:MGI Symbol;Acc:MGI:2685230]	protein_coding	X	-	136072099	136085255	72.6228	1.02132	0.330196	-3.09306	0.00198103	0.0272302
ENSMUSG00000023017	Asic1	acid-sensing (proton-gated) ion channel 1 [Source:MGI Symbol;Acc:MGI:1194915]	protein_coding	15	+	99670718	99701127	116.063	1.01273	0.264122	-3.83431	0.000125918	0.00281383
ENSMUSG00000020829	Slc46a1	solute carrier family 46, member 1 [Source:MGI Symbol;Acc:MGI:1098733]	protein_coding	11	+	78465697	78472059	373.373	1.00812	0.140873	-7.15622	8.29301e-13	8.86424e-11
ENSMUSG00000043557	Mdga1	MAM domain containing glycosylphosphatidylinositol anchor 1 [Source:MGI Symbol;Acc:MGI:1922012]	protein_coding	17	-	29827956	29970087	305.555	1.00053	0.148809	-6.72361	1.77278e-11	1.63235e-09
ENSMUSG00000024304	Cdh2	cadherin 2 [Source:MGI Symbol;Acc:MGI:88355]	protein_coding	18	-	16588877	16809246	106.08	-1.00167	0.247844	4.04154	5.31009e-05	0.00134217
ENSMUSG00000030232	Aebp2	AE binding protein 2 [Source:MGI Symbol;Acc:MGI:1338038]	protein_coding	6	+	140622663	140678472	338.657	-1.00275	0.139267	7.20022	6.01135e-13	6.5631e-11
ENSMUSG00000020661	Dnmt3a	DNA methyltransferase 3A [Source:MGI Symbol;Acc:MGI:1261827]	protein_coding	12	+	3806007	3914443	461.776	-1.00585	0.152991	6.57457	4.87954e-11	4.21378e-09
ENSMUSG00000078902	Gm14443	predicted gene 14443 [Source:MGI Symbol;Acc:MGI:3652324]	protein_coding	2	-	175166255	175175871	45.3385	-1.00754	0.325085	3.09933	0.00193958	0.0267567
ENSMUSG00000021803	Cdhr1	cadherin-related family member 1 [Source:MGI Symbol;Acc:MGI:2157782]	protein_coding	14	-	37077857	37098347	229.221	-1.00863	0.1836	5.4936	3.93825e-08	2.05448e-06
ENSMUSG00000025959	Klf7	Kruppel-like factor 7 (ubiquitous) [Source:MGI Symbol;Acc:MGI:1935151]	protein_coding	1	-	64029447	64122282	195.002	-1.01431	0.20182	5.02583	5.01269e-07	2.08771e-05
ENSMUSG00000059493	Nhs	NHS actin remodeling regulator [Source:MGI Symbol;Acc:MGI:2684894]	protein_coding	X	-	161833296	162159730	146.617	-1.02303	0.221887	4.61059	4.01524e-06	0.000140442
ENSMUSG00000028149	Rap1gds1	RAP1, GTP-GDP dissociation stimulator 1 [Source:MGI Symbol;Acc:MGI:2385189]	protein_coding	3	-	138925902	139075201	402.203	-1.02536	0.123676	8.29072	1.12563e-16	2.32503e-14
ENSMUSG00000092622	Khdc3	KH domain containing 3, subcortical maternal complex member [Source:MGI Symbol;Acc:MGI:1914241]	protein_coding	9	+	73101836	73104438	149.674	-1.03149	0.221381	4.65935	3.17207e-06	0.000114083
ENSMUSG00000003418	St8sia6	ST8 alpha-N-acetyl-neuraminide alpha-2,8-sialyltransferase 6 [Source:MGI Symbol;Acc:MGI:2386797]	protein_coding	2	-	13651021	13794064	62.6088	-1.0334	0.353083	2.92678	0.00342488	0.0411875
ENSMUSG00000073207	Ccdc160	coiled-coil domain containing 160 [Source:MGI Symbol;Acc:MGI:3588225]	protein_coding	X	+	52791200	52799468	56.9724	-1.03372	0.290554	3.55776	0.000374035	0.00705817
ENSMUSG00000055653	Gpc3	glypican 3 [Source:MGI Symbol;Acc:MGI:104903]	protein_coding	X	-	52272426	52613950	897.809	-1.03444	0.126556	8.17376	2.98915e-16	5.71115e-14
ENSMUSG00000025085	Ablim1	actin-binding LIM protein 1 [Source:MGI Symbol;Acc:MGI:1194500]	protein_coding	19	-	57032733	57314919	169.217	-1.03513	0.23949	4.32222	1.54464e-05	0.000461129
ENSMUSG00000027400	Pdyn	prodynorphin [Source:MGI Symbol;Acc:MGI:97535]	protein_coding	2	-	129686565	129699844	46.5967	-1.03735	0.3615	2.86957	0.00411028	0.047585
ENSMUSG00000048752	Prss50	protease, serine 50 [Source:MGI Symbol;Acc:MGI:2447303]	protein_coding	9	+	110857967	110864629	47.361	-1.03914	0.356744	2.91285	0.00358143	0.0426839
ENSMUSG00000040270	Bach2	BTB and CNC homology, basic leucine zipper transcription factor 2 [Source:MGI Symbol;Acc:MGI:894679]	protein_coding	4	+	32238804	32586108	105.816	-1.04571	0.30896	3.38463	0.000712754	0.012159
ENSMUSG00000063952	Brpf3	bromodomain and PHD finger containing, 3 [Source:MGI Symbol;Acc:MGI:2146836]	protein_coding	17	+	28801090	28838546	2336.04	-1.05395	0.0867056	12.1555	5.36623e-34	4.10114e-31
ENSMUSG00000030246	Ldhb	lactate dehydrogenase B [Source:MGI Symbol;Acc:MGI:96763]	protein_coding	6	-	142490249	142507957	436.798	-1.05905	0.149883	7.06584	1.59649e-12	1.66002e-10
ENSMUSG00000022040	Ephx2	epoxide hydrolase 2, cytoplasmic [Source:MGI Symbol;Acc:MGI:99500]	protein_coding	14	-	66084374	66124500	472.431	-1.07028	0.118913	9.00056	2.24561e-19	5.81765e-17
ENSMUSG00000030111	A2m	alpha-2-macroglobulin [Source:MGI Symbol;Acc:MGI:2449119]	protein_coding	6	+	121635376	121679227	586.147	-1.0729	0.13362	8.02948	9.78866e-16	1.71977e-13
ENSMUSG00000020044	Timp3	tissue inhibitor of metalloproteinase 3 [Source:MGI Symbol;Acc:MGI:98754]	protein_coding	10	+	86300372	86349506	101.427	-1.08025	0.263688	4.09669	4.19104e-05	0.00108761
ENSMUSG00000032232	Cgnl1	cingulin-like 1 [Source:MGI Symbol;Acc:MGI:1915428]	protein_coding	9	-	71626509	71771602	453.732	-1.08144	0.108997	9.9218	3.34682e-23	1.18968e-20
ENSMUSG00000022203	Efs	embryonal Fyn-associated substrate [Source:MGI Symbol;Acc:MGI:105311]	protein_coding	14	-	54916543	54926788	589.417	-1.08327	0.137984	7.85065	4.1387e-15	6.7298e-13
ENSMUSG00000072720	Myo18b	myosin XVIIIb [Source:MGI Symbol;Acc:MGI:1921626]	protein_coding	5	-	112688876	112896362	70.7313	-1.10179	0.357204	3.08448	0.00203907	0.0277782
ENSMUSG00000071708	Sms	spermine synthase [Source:MGI Symbol;Acc:MGI:109490]	protein_coding	X	-	157443855	157492287	153.015	-1.1054	0.204884	5.39523	6.84343e-08	3.3634e-06
ENSMUSG00000085403	Gm13068	predicted gene 13068 [Source:MGI Symbol;Acc:MGI:3651967]	antisense_RNA	4	+	149748518	149749607	41.2331	-1.10908	0.375626	2.95261	0.00315101	0.0386543
ENSMUSG00000052534	Pbx1	pre B cell leukemia homeobox 1 [Source:MGI Symbol;Acc:MGI:97495]	protein_coding	1	-	168119364	168432270	146.191	-1.11056	0.247919	4.47951	7.48129e-06	0.000245917
ENSMUSG00000046449	C77370	expressed sequence C77370 [Source:MGI Symbol;Acc:MGI:2148050]	protein_coding	X	-	104077434	104201185	922.991	-1.11361	0.119885	9.28901	1.55727e-20	4.4911e-18
ENSMUSG00000021061	Sptb	spectrin beta, erythrocytic [Source:MGI Symbol;Acc:MGI:98387]	protein_coding	12	-	76580488	76710547	130.875	-1.12741	0.2592	4.34958	1.36402e-05	0.000413973
ENSMUSG00000029026	Trp73	transformation related protein 73 [Source:MGI Symbol;Acc:MGI:1336991]	protein_coding	4	-	154056253	154140208	93.3344	-1.12746	0.228877	4.92605	8.39082e-07	3.41868e-05
ENSMUSG00000061322	Dnaic1	dynein, axonemal, intermediate chain 1 [Source:MGI Symbol;Acc:MGI:1916172]	protein_coding	4	+	41569775	41638158	70.043	-1.12848	0.270549	4.17107	3.03171e-05	0.000814407
ENSMUSG00000029778	Adcyap1r1	adenylate cyclase activating polypeptide 1 receptor 1 [Source:MGI Symbol;Acc:MGI:108449]	protein_coding	6	+	55451978	55501451	59.0101	-1.13206	0.292868	3.86542	0.0001109	0.00254902
ENSMUSG00000028527	Ak4	adenylate kinase 4 [Source:MGI Symbol;Acc:MGI:87979]	protein_coding	4	+	101419277	101466995	327.249	-1.13385	0.201435	5.62886	1.81408e-08	9.83269e-07
ENSMUSG00000057132	Rpgrip1	retinitis pigmentosa GTPase regulator interacting protein 1 [Source:MGI Symbol;Acc:MGI:1932134]	protein_coding	14	+	52110704	52163546	90.2645	-1.14057	0.373679	3.05228	0.00227112	0.030371
ENSMUSG00000046000	Naa11	N(alpha)-acetyltransferase 11, NatA catalytic subunit [Source:MGI Symbol;Acc:MGI:2141314]	protein_coding	5	-	97382198	97392379	98.3089	-1.14348	0.293271	3.89908	9.65604e-05	0.00227066
ENSMUSG00000049680	Urgcp	upregulator of cell proliferation [Source:MGI Symbol;Acc:MGI:1919296]	protein_coding	11	-	5713417	5762376	186.44	-1.14545	0.179987	6.36406	1.96494e-10	1.55617e-08
ENSMUSG00000078706	Gm53	predicted gene 53 [Source:MGI Symbol;Acc:MGI:2684899]	lincRNA	11	+	96251105	96264868	110.921	-1.1566	0.263053	4.39682	1.09848e-05	0.000346907
ENSMUSG00000095193	Gm20939	predicted gene, 20939 [Source:MGI Symbol;Acc:MGI:5434295]	protein_coding	17	+	94873986	94877497	57.4622	-1.16174	0.36037	3.22373	0.00126534	0.0192444
ENSMUSG00000028874	Fgr	FGR proto-oncogene, Src family tyrosine kinase [Source:MGI Symbol;Acc:MGI:95527]	protein_coding	4	+	132974095	133001910	82.4896	-1.16593	0.294225	3.96271	7.41029e-05	0.00178653
ENSMUSG00000047139	Cd24a	CD24a antigen [Source:MGI Symbol;Acc:MGI:88323]	protein_coding	10	+	43578284	43584265	161.772	-1.17564	0.227302	5.17217	2.31389e-07	1.05576e-05
ENSMUSG00000029552	Tes	testis derived transcript [Source:MGI Symbol;Acc:MGI:105081]	protein_coding	6	+	17065149	17105828	41.2898	-1.17692	0.394518	2.98318	0.00285275	0.0359474
ENSMUSG00000029570	Lfng	LFNG O-fucosylpeptide 3-beta-N-acetylglucosaminyltransferase [Source:MGI Symbol;Acc:MGI:1095413]	protein_coding	5	+	140607320	140615545	55.2593	-1.17741	0.383562	3.06967	0.00214296	0.0290382
ENSMUSG00000036766	Dner	delta/notch-like EGF repeat containing [Source:MGI Symbol;Acc:MGI:2152889]	protein_coding	1	-	84369839	84696221	172.677	-1.18122	0.287659	4.10633	4.01999e-05	0.00104499
ENSMUSG00000039552	Rsph4a	radial spoke head 4 homolog A (Chlamydomonas) [Source:MGI Symbol;Acc:MGI:3027894]	protein_coding	10	+	33905111	33916021	115.49	-1.195	0.226392	5.27846	1.30273e-07	6.17687e-06
ENSMUSG00000015599	Ttbk1	tau tubulin kinase 1 [Source:MGI Symbol;Acc:MGI:2147036]	protein_coding	17	-	46442448	46487675	38.8337	-1.19553	0.393278	3.03992	0.00236642	0.0313624
ENSMUSG00000027577	Chrna4	cholinergic receptor, nicotinic, alpha polypeptide 4 [Source:MGI Symbol;Acc:MGI:87888]	protein_coding	2	-	181018380	181043546	55.8729	-1.20894	0.319592	3.78276	0.000155096	0.00336252
ENSMUSG00000021322	Aoah	acyloxyacyl hydrolase [Source:MGI Symbol;Acc:MGI:1350928]	protein_coding	13	+	20794113	21036617	282.218	-1.22753	0.143129	8.57642	9.78744e-18	2.23285e-15
ENSMUSG00000020723	Cacng4	calcium channel, voltage-dependent, gamma subunit 4 [Source:MGI Symbol;Acc:MGI:1859167]	protein_coding	11	-	107732357	107794557	121.344	-1.23091	0.216397	5.68822	1.2837e-08	7.26719e-07
ENSMUSG00000069874	Irgm2	immunity-related GTPase family M member 2 [Source:MGI Symbol;Acc:MGI:1926262]	protein_coding	11	+	58199618	58222782	49.0021	-1.23687	0.368087	3.36025	0.000778722	0.0130227
ENSMUSG00000068748	Ptprz1	protein tyrosine phosphatase, receptor type Z, polypeptide 1 [Source:MGI Symbol;Acc:MGI:97816]	protein_coding	6	+	22875502	23052916	36.8025	-1.24676	0.410192	3.03946	0.00237	0.0313624
ENSMUSG00000006056	Calcoco2	calcium binding and coiled-coil domain 2 [Source:MGI Symbol;Acc:MGI:1343177]	protein_coding	11	-	96099326	96111964	299.834	-1.25227	0.190336	6.57925	4.72813e-11	4.12968e-09
ENSMUSG00000049929	Lpar4	lysophosphatidic acid receptor 4 [Source:MGI Symbol;Acc:MGI:1925384]	protein_coding	X	+	106920625	106933900	99.6234	-1.25666	0.263669	4.76603	1.87887e-06	7.09099e-05
ENSMUSG00000040601	Nlrp4a	NLR family, pyrin domain containing 4A [Source:MGI Symbol;Acc:MGI:2443697]	protein_coding	7	+	26435113	26476142	74.4855	-1.25998	0.271587	4.63933	3.49548e-06	0.000124366
ENSMUSG00000052942	Glis3	GLIS family zinc finger 3 [Source:MGI Symbol;Acc:MGI:2444289]	protein_coding	19	-	28258851	28680077	268.331	-1.26627	0.15964	7.932	2.1565e-15	3.62222e-13
ENSMUSG00000028919	Arhgef19	Rho guanine nucleotide exchange factor (GEF) 19 [Source:MGI Symbol;Acc:MGI:1925912]	protein_coding	4	+	141239499	141257564	59.7142	-1.26838	0.416162	3.0478	0.00230521	0.0306927
ENSMUSG00000021217	Tshz3	teashirt zinc finger family member 3 [Source:MGI Symbol;Acc:MGI:2442819]	protein_coding	7	+	36698118	36773553	141.979	-1.27032	0.18317	6.93523	4.05567e-12	3.94846e-10
ENSMUSG00000022257	Laptm4b	lysosomal-associated protein transmembrane 4B [Source:MGI Symbol;Acc:MGI:1890494]	protein_coding	15	+	34238026	34284295	371.542	-1.27323	0.165058	7.71388	1.2205e-14	1.75993e-12
ENSMUSG00000045287	Rtn4rl1	reticulon 4 receptor-like 1 [Source:MGI Symbol;Acc:MGI:2661375]	protein_coding	11	+	75193783	75267769	44.1124	-1.2733	0.363211	3.50568	0.000455449	0.00828754
ENSMUSG00000034837	Gnat1	guanine nucleotide binding protein, alpha transducing 1 [Source:MGI Symbol;Acc:MGI:95778]	protein_coding	9	-	107674474	107679712	58.8781	-1.28184	0.363139	3.52989	0.000415737	0.0076653
ENSMUSG00000008496	Pou2f2	POU domain, class 2, transcription factor 2 [Source:MGI Symbol;Acc:MGI:101897]	protein_coding	7	-	25087344	25179726	96.3763	-1.297	0.401752	3.22837	0.00124498	0.0190295
ENSMUSG00000035299	Mid1	midline 1 [Source:MGI Symbol;Acc:MGI:1100537]	protein_coding	X	+	169685199	170005736	553.964	-1.29959	0.176022	7.38307	1.54683e-13	1.96153e-11
ENSMUSG00000060402	Chst8	carbohydrate (N-acetylgalactosamine 4-0) sulfotransferase 8 [Source:MGI Symbol;Acc:MGI:1916197]	protein_coding	7	-	34674468	34812711	104.712	-1.30042	0.337907	3.84844	0.000118872	0.00268781
ENSMUSG00000054364	Rhob	ras homolog family member B [Source:MGI Symbol;Acc:MGI:107949]	protein_coding	12	-	8497661	8500009	167.086	-1.30686	0.227476	5.74504	9.18978e-09	5.28067e-07
ENSMUSG00000027227	Sord	sorbitol dehydrogenase [Source:MGI Symbol;Acc:MGI:98266]	protein_coding	2	+	122234749	122265340	72.6674	-1.31508	0.275524	4.77303	1.81475e-06	6.88299e-05
ENSMUSG00000040855	Reps2	RALBP1 associated Eps domain containing protein 2 [Source:MGI Symbol;Acc:MGI:2663511]	protein_coding	X	-	162411954	162643649	41.3726	-1.31573	0.400766	3.28304	0.00102692	0.0162827
ENSMUSG00000022885	St6gal1	beta galactoside alpha 2,6 sialyltransferase 1 [Source:MGI Symbol;Acc:MGI:108470]	protein_coding	16	+	23224740	23360350	224.409	-1.31744	0.169393	7.77745	7.40009e-15	1.1311e-12
ENSMUSG00000024548	Setbp1	SET binding protein 1 [Source:MGI Symbol;Acc:MGI:1933199]	protein_coding	18	-	78750380	79109391	92.9214	-1.31993	0.258788	5.10044	3.38874e-07	1.48841e-05
ENSMUSG00000052776	Oas1a	2'-5' oligoadenylate synthetase 1A [Source:MGI Symbol;Acc:MGI:2180860]	protein_coding	5	-	120896256	120907521	59.7953	-1.32212	0.330071	4.00556	6.18718e-05	0.00153275
ENSMUSG00000064373	Selenop	selenoprotein P [Source:MGI Symbol;Acc:MGI:894288]	protein_coding	15	+	3268547	3280508	51.0821	-1.32852	0.356576	3.72576	0.000194731	0.00409981
ENSMUSG00000026463	Atp2b4	ATPase, Ca++ transporting, plasma membrane 4 [Source:MGI Symbol;Acc:MGI:88111]	protein_coding	1	-	133699457	133801041	348.589	-1.33092	0.178302	7.4644	8.36775e-14	1.09317e-11
ENSMUSG00000072294	Klf12	Kruppel-like factor 12 [Source:MGI Symbol;Acc:MGI:1333796]	protein_coding	14	-	99874486	100149764	529.623	-1.33476	0.158152	8.43974	3.18048e-17	6.84699e-15
ENSMUSG00000031111	Igsf1	immunoglobulin superfamily, member 1 [Source:MGI Symbol;Acc:MGI:2147913]	protein_coding	X	-	49782536	49797749	30.3746	-1.34408	0.437809	3.07001	0.00214054	0.0290311
ENSMUSG00000027985	Lef1	lymphoid enhancer binding factor 1 [Source:MGI Symbol;Acc:MGI:96770]	protein_coding	3	+	131110471	131224356	282.817	-1.35395	0.407867	3.31959	0.000901511	0.0146748
ENSMUSG00000020258	Glyctk	glycerate kinase [Source:MGI Symbol;Acc:MGI:2444085]	protein_coding	9	-	106152857	106158138	40.9913	-1.35923	0.392653	3.46167	0.000536844	0.00955139
ENSMUSG00000025969	Nrp2	neuropilin 2 [Source:MGI Symbol;Acc:MGI:1100492]	protein_coding	1	+	62703285	62818695	1269.98	-1.36222	0.132955	10.2457	1.23674e-24	4.7259e-22
ENSMUSG00000027377	Mall	mal, T cell differentiation protein-like [Source:MGI Symbol;Acc:MGI:2385152]	protein_coding	2	-	127704386	127729932	73.0531	-1.36522	0.335881	4.0646	4.81141e-05	0.00122571
ENSMUSG00000031163	Glod5	glyoxalase domain containing 5 [Source:MGI Symbol;Acc:MGI:1917074]	protein_coding	X	-	8004200	8018492	323.989	-1.36562	0.168855	8.08755	6.08793e-16	1.08202e-13
ENSMUSG00000030922	Lyrm1	LYR motif containing 1 [Source:MGI Symbol;Acc:MGI:1921169]	protein_coding	7	+	119895861	119956963	60.5943	-1.37953	0.322686	4.27515	1.91011e-05	0.000548798
ENSMUSG00000070327	Rnf213	ring finger protein 213 [Source:MGI Symbol;Acc:MGI:1289196]	protein_coding	11	+	119393100	119487418	1399.64	-1.39456	0.0812364	17.1667	4.71597e-66	1.02977e-62
ENSMUSG00000032936	Camkv	CaM kinase-like vesicle-associated [Source:MGI Symbol;Acc:MGI:2384296]	protein_coding	9	+	107935674	107949691	263.404	-1.39799	0.150943	9.26172	2.01164e-20	5.39437e-18
ENSMUSG00000030849	Fgfr2	fibroblast growth factor receptor 2 [Source:MGI Symbol;Acc:MGI:95523]	protein_coding	7	-	130162451	133123350	50.0836	-1.40141	0.411484	3.40574	0.000659844	0.0114221
ENSMUSG00000037541	Shank2	SH3/ankyrin domain gene 2 [Source:MGI Symbol;Acc:MGI:2671987]	protein_coding	7	+	144001928	144424494	36.8301	-1.40353	0.451299	3.10998	0.00187097	0.0262125
ENSMUSG00000029086	Prom1	prominin 1 [Source:MGI Symbol;Acc:MGI:1100886]	protein_coding	5	-	43993620	44102032	31.854	-1.40521	0.446441	3.14758	0.00164628	0.0237775
ENSMUSG00000066113	Adamtsl1	ADAMTS-like 1 [Source:MGI Symbol;Acc:MGI:1924989]	protein_coding	4	+	85514172	86428385	51.4119	-1.40769	0.355717	3.95734	7.57882e-05	0.00181856
ENSMUSG00000022892	App	amyloid beta (A4) precursor protein [Source:MGI Symbol;Acc:MGI:88059]	protein_coding	16	-	84954440	85173707	54.4043	-1.41568	0.4459	3.17487	0.00149902	0.0221806
ENSMUSG00000035000	Dpp4	dipeptidylpeptidase 4 [Source:MGI Symbol;Acc:MGI:94919]	protein_coding	2	-	62330073	62412231	63.3917	-1.41719	0.36723	3.85915	0.000113783	0.00260354
ENSMUSG00000028392	Bspry	B-box and SPRY domain containing [Source:MGI Symbol;Acc:MGI:2177191]	protein_coding	4	+	62480053	62497298	39.1509	-1.42232	0.40212	3.53705	0.000404616	0.00749643
ENSMUSG00000030465	Psd3	pleckstrin and Sec7 domain containing 3 [Source:MGI Symbol;Acc:MGI:1918215]	protein_coding	8	-	67689082	68212027	40.6939	-1.43649	0.448635	3.20191	0.00136521	0.0204581
ENSMUSG00000027452	Acss1	acyl-CoA synthetase short-chain family member 1 [Source:MGI Symbol;Acc:MGI:1915988]	protein_coding	2	-	150618105	150668500	104.636	-1.44311	0.326131	4.42494	9.64672e-06	0.000311076
ENSMUSG00000005892	Trh	thyrotropin releasing hormone [Source:MGI Symbol;Acc:MGI:98823]	protein_coding	6	-	92242061	92244650	3896.56	-1.44772	0.103973	13.924	4.53055e-44	4.0735e-41
ENSMUSG00000027863	Cd2	CD2 antigen [Source:MGI Symbol;Acc:MGI:88320]	protein_coding	3	-	101275899	101287939	38.3138	-1.50147	0.425767	3.5265	0.000421085	0.0077433
ENSMUSG00000033083	Tbc1d4	TBC1 domain family, member 4 [Source:MGI Symbol;Acc:MGI:2429660]	protein_coding	14	-	101442360	101609191	33.7173	-1.5034	0.491586	3.05826	0.00222623	0.030007
ENSMUSG00000071856	Mcc	mutated in colorectal cancers [Source:MGI Symbol;Acc:MGI:96930]	protein_coding	18	-	44425060	44812182	74.2299	-1.51783	0.364806	4.16066	3.17327e-05	0.000849446
ENSMUSG00000002578	Ikzf4	IKAROS family zinc finger 4 [Source:MGI Symbol;Acc:MGI:1343139]	protein_coding	10	-	128630843	128645991	46.3434	-1.52491	0.430558	3.5417	0.000397555	0.00738351
ENSMUSG00000028836	Slc30a2	solute carrier family 30 (zinc transporter), member 2 [Source:MGI Symbol;Acc:MGI:106637]	protein_coding	4	+	134343181	134354484	134.265	-1.52536	0.299263	5.09706	3.44978e-07	1.50657e-05
ENSMUSG00000079173	Zan	zonadhesin [Source:MGI Symbol;Acc:MGI:106656]	protein_coding	5	-	137378637	137477064	85.768	-1.5292	0.347555	4.39987	1.08315e-05	0.000344199
ENSMUSG00000030257	Srgap3	SLIT-ROBO Rho GTPase activating protein 3 [Source:MGI Symbol;Acc:MGI:2152938]	protein_coding	6	-	112717971	112947266	450.801	-1.53521	0.136324	11.2615	2.03187e-29	1.29405e-26
ENSMUSG00000017009	Sdc4	syndecan 4 [Source:MGI Symbol;Acc:MGI:1349164]	protein_coding	2	-	164424247	164443887	495.789	-1.53645	0.109926	13.9772	2.14697e-44	2.18777e-41
ENSMUSG00000001123	Lgals9	lectin, galactose binding, soluble 9 [Source:MGI Symbol;Acc:MGI:109496]	protein_coding	11	-	78962974	78984946	143.544	-1.5408	0.214031	7.19893	6.06848e-13	6.57849e-11
ENSMUSG00000024776	Stambpl1	STAM binding protein like 1 [Source:MGI Symbol;Acc:MGI:1923880]	protein_coding	19	+	34192229	34240333	23.2244	-1.55436	0.500198	3.10749	0.00188685	0.0262994
ENSMUSG00000060548	Tnfrsf19	tumor necrosis factor receptor superfamily, member 19 [Source:MGI Symbol;Acc:MGI:1352474]	protein_coding	14	-	60963875	61046490	28.8664	-1.56329	0.485	3.22329	0.00126729	0.019255
ENSMUSG00000027692	Tnik	TRAF2 and NCK interacting kinase [Source:MGI Symbol;Acc:MGI:1916264]	protein_coding	3	+	28263214	28675858	318.954	-1.56921	0.142533	11.0094	3.44283e-28	1.87942e-25
ENSMUSG00000040978	Gm11992	predicted gene 11992 [Source:MGI Symbol;Acc:MGI:3651127]	protein_coding	11	+	9048594	9069356	19.804	-1.57592	0.525899	2.99661	0.00272996	0.034831
ENSMUSG00000038756	Ttll6	tubulin tyrosine ligase-like family, member 6 [Source:MGI Symbol;Acc:MGI:2683461]	protein_coding	11	+	96133786	96165451	211.335	-1.58038	0.231632	6.82283	8.9262e-12	8.47434e-10
ENSMUSG00000019102	Aldh3a1	aldehyde dehydrogenase family 3, subfamily A1 [Source:MGI Symbol;Acc:MGI:1353451]	protein_coding	11	+	61207537	61218421	75.7135	-1.58066	0.29753	5.3126	1.0807e-07	5.16204e-06
ENSMUSG00000026532	Spta1	spectrin alpha, erythrocytic 1 [Source:MGI Symbol;Acc:MGI:98385]	protein_coding	1	+	174172776	174248450	18.9804	-1.58819	0.513066	3.09548	0.00196495	0.0270822
ENSMUSG00000033214	Slitrk5	SLIT and NTRK-like family, member 5 [Source:MGI Symbol;Acc:MGI:2679448]	protein_coding	14	+	111675115	111683134	24.1713	-1.59712	0.50586	3.15724	0.0015927	0.0232961
ENSMUSG00000019326	Aoc3	amine oxidase, copper containing 3 [Source:MGI Symbol;Acc:MGI:1306797]	protein_coding	11	+	101330605	101341938	128.586	-1.60677	0.259201	6.19892	5.68517e-10	4.15779e-08
ENSMUSG00000020583	Matn3	matrilin 3 [Source:MGI Symbol;Acc:MGI:1328350]	protein_coding	12	+	8947929	8972028	37.1969	-1.6121	0.539169	2.98997	0.00279009	0.035362
ENSMUSG00000026674	Ddr2	discoidin domain receptor family, member 2 [Source:MGI Symbol;Acc:MGI:1345277]	protein_coding	1	-	169972307	170110762	79.5993	-1.61647	0.273186	5.91711	3.27646e-09	2.06945e-07
ENSMUSG00000024663	Rab3il1	RAB3A interacting protein (rabin3)-like 1 [Source:MGI Symbol;Acc:MGI:1922010]	protein_coding	19	+	10001669	10038380	336.484	-1.62491	0.151475	10.7272	7.58493e-27	3.73986e-24
ENSMUSG00000001300	Efnb2	ephrin B2 [Source:MGI Symbol;Acc:MGI:105097]	protein_coding	8	-	8617434	8661242	59.4756	-1.6407	0.289685	5.66374	1.48109e-08	8.23216e-07
ENSMUSG00000001663	Gstt1	glutathione S-transferase, theta 1 [Source:MGI Symbol;Acc:MGI:107379]	protein_coding	10	-	75783813	75798584	38.5566	-1.65224	0.456692	3.61783	0.000297078	0.0058743
ENSMUSG00000073650	Catip	ciliogenesis associated TTC17 interacting protein [Source:MGI Symbol;Acc:MGI:2685062]	protein_coding	1	+	74362108	74369321	38.8405	-1.6597	0.432856	3.83431	0.000125918	0.00281383
ENSMUSG00000040957	Cables1	CDK5 and Abl enzyme substrate 1 [Source:MGI Symbol;Acc:MGI:1927065]	protein_coding	18	+	11839220	11945630	30.902	-1.66275	0.459458	3.61893	0.000295818	0.0058696
ENSMUSG00000069793	Slfn9	schlafen 9 [Source:MGI Symbol;Acc:MGI:2445121]	protein_coding	11	-	82978390	82991830	293.919	-1.66325	0.184435	9.01808	1.91411e-19	5.04434e-17
ENSMUSG00000024302	Dtna	dystrobrevin alpha [Source:MGI Symbol;Acc:MGI:106039]	protein_coding	18	+	23415135	23659715	110.246	-1.66826	0.242822	6.8703	6.40659e-12	6.1203e-10
ENSMUSG00000097416	Gm26670	predicted gene, 26670 [Source:MGI Symbol;Acc:MGI:5477164]	antisense_RNA	1	-	191986836	191990122	24.1329	-1.67318	0.568574	2.94277	0.00325292	0.0396814
ENSMUSG00000041703	Zic5	zinc finger protein of the cerebellum 5 [Source:MGI Symbol;Acc:MGI:1929518]	protein_coding	14	-	122456795	122465677	303.26	-1.68248	0.141085	11.9253	8.73377e-33	6.35694e-30
ENSMUSG00000040543	Pitpnm3	PITPNM family member 3 [Source:MGI Symbol;Acc:MGI:2685726]	protein_coding	11	-	72047528	72135778	27.0246	-1.7129	0.474436	3.6104	0.000305731	0.00599115
ENSMUSG00000033022	Cdo1	cysteine dioxygenase 1, cytosolic [Source:MGI Symbol;Acc:MGI:105925]	protein_coding	18	-	46713205	46728342	40.8576	-1.72647	0.380397	4.53861	5.66276e-06	0.000191494
ENSMUSG00000027500	Stmn2	stathmin-like 2 [Source:MGI Symbol;Acc:MGI:98241]	protein_coding	3	+	8509360	8561606	1372.99	-1.72764	0.121209	14.2534	4.27037e-46	5.43938e-43
ENSMUSG00000041670	Rims1	regulating synaptic membrane exocytosis 1 [Source:MGI Symbol;Acc:MGI:2152971]	protein_coding	1	-	22286251	22805994	53.96	-1.72855	0.375991	4.59732	4.2796e-06	0.000149346
ENSMUSG00000036334	Igsf10	immunoglobulin superfamily, member 10 [Source:MGI Symbol;Acc:MGI:1923481]	protein_coding	3	-	59316735	59344394	85.5912	-1.73862	0.307683	5.65069	1.59801e-08	8.78616e-07
ENSMUSG00000036634	Mag	myelin-associated glycoprotein [Source:MGI Symbol;Acc:MGI:96912]	protein_coding	7	-	30899176	30914873	33.0581	-1.74837	0.515947	3.38866	0.000702361	0.0120219
ENSMUSG00000021130	Galnt16	UDP-N-acetyl-alpha-D-galactosamine:polypeptide N-acetylgalactosaminyltransferase 16 [Source:MGI Symbol;Acc:MGI:1917754]	protein_coding	12	+	80518277	80630972	51.1156	-1.75184	0.360088	4.86503	1.14441e-06	4.48713e-05
ENSMUSG00000034981	Parm1	prostate androgen-regulated mucin-like protein 1 [Source:MGI Symbol;Acc:MGI:2443349]	protein_coding	5	+	91517615	91626894	72.8845	-1.75759	0.321944	5.4593	4.78021e-08	2.42743e-06
ENSMUSG00000032456	Nmnat3	nicotinamide nucleotide adenylyltransferase 3 [Source:MGI Symbol;Acc:MGI:1921330]	protein_coding	9	+	98287435	98420438	23.187	-1.77176	0.471106	3.76085	0.000169337	0.00364551
ENSMUSG00000049154	Fam183b	family with sequence similarity 183, member B [Source:MGI Symbol;Acc:MGI:1922679]	protein_coding	11	-	58792797	58801960	18.5724	-1.78303	0.566978	3.1448	0.00166203	0.0239033
ENSMUSG00000010021	Kif19a	kinesin family member 19A [Source:MGI Symbol;Acc:MGI:2447024]	protein_coding	11	+	114765388	114790739	21.5666	-1.79561	0.610172	2.94279	0.00325273	0.0396814
ENSMUSG00000042268	Slc26a9	solute carrier family 26, member 9 [Source:MGI Symbol;Acc:MGI:2444594]	protein_coding	1	+	131744022	131771504	22.7393	-1.86397	0.527152	3.53593	0.000406341	0.00751928
ENSMUSG00000037033	Clca3b	chloride channel accessory 3B [Source:MGI Symbol;Acc:MGI:2181989]	protein_coding	3	-	144822623	144849357	57.0481	-1.89047	0.288171	6.56023	5.37238e-11	4.56205e-09
ENSMUSG00000054150	Syne3	spectrin repeat containing, nuclear envelope family member 3 [Source:MGI Symbol;Acc:MGI:2442408]	protein_coding	12	-	104929933	105009809	20.476	-1.89981	0.609403	3.11749	0.00182398	0.0256717
ENSMUSG00000068048	Rhox9	reproductive homeobox 9 [Source:MGI Symbol;Acc:MGI:1890128]	protein_coding	X	-	37899097	37901770	12.4249	-1.90083	0.596178	3.18836	0.00143082	0.0213366
ENSMUSG00000021228	Acot3	acyl-CoA thioesterase 3 [Source:MGI Symbol;Acc:MGI:2159619]	protein_coding	12	+	84052144	84060402	12.7242	-1.92794	0.634887	3.03667	0.00239209	0.0314213
ENSMUSG00000061577	Adgrg5	adhesion G protein-coupled receptor G5 [Source:MGI Symbol;Acc:MGI:2685955]	protein_coding	8	+	94923694	94943280	23.8751	-1.9363	0.597405	3.24119	0.00119033	0.0183594
ENSMUSG00000028931	Kcnab2	potassium voltage-gated channel, shaker-related subfamily, beta member 2 [Source:MGI Symbol;Acc:MGI:109239]	protein_coding	4	-	152390742	152477871	69.1103	-1.94233	0.374151	5.19129	2.08843e-07	9.67321e-06
ENSMUSG00000039013	Siglecf	sialic acid binding Ig-like lectin F [Source:MGI Symbol;Acc:MGI:2681107]	protein_coding	7	+	43351341	43359531	27.3	-1.94973	0.438901	4.44229	8.90049e-06	0.000288229
ENSMUSG00000021848	Otx2	orthodenticle homeobox 2 [Source:MGI Symbol;Acc:MGI:97451]	protein_coding	14	-	48657679	48667644	202.788	-1.97483	0.239654	8.24034	1.71719e-16	3.36504e-14
ENSMUSG00000037411	Serpine1	serine (or cysteine) peptidase inhibitor, clade E, member 1 [Source:MGI Symbol;Acc:MGI:97608]	protein_coding	5	-	137061504	137072268	119.309	-1.98308	0.323604	6.12812	8.8923e-10	6.23481e-08
ENSMUSG00000037280	Galnt6	UDP-N-acetyl-alpha-D-galactosamine:polypeptide N-acetylgalactosaminyltransferase 6 [Source:MGI Symbol;Acc:MGI:1891640]	protein_coding	15	-	100691813	100729376	72.7853	-1.9839	0.342048	5.80007	6.62879e-09	3.95785e-07
ENSMUSG00000067889	Sptbn2	spectrin beta, non-erythrocytic 2 [Source:MGI Symbol;Acc:MGI:1313261]	protein_coding	19	+	4711208	4752353	159.415	-1.98551	0.176882	11.225	3.07336e-29	1.87905e-26
ENSMUSG00000046402	Rbp1	retinol binding protein 1, cellular [Source:MGI Symbol;Acc:MGI:97876]	protein_coding	9	+	98422961	98446575	47.1497	-1.99785	0.389522	5.12898	2.91315e-07	1.30579e-05
ENSMUSG00000028278	Rragd	Ras-related GTP binding D [Source:MGI Symbol;Acc:MGI:1098604]	protein_coding	4	+	32983037	33022180	292.745	-2.01693	0.189541	10.6411	1.91866e-26	9.16459e-24
ENSMUSG00000026177	Slc11a1	solute carrier family 11 (proton-coupled divalent metal ion transporters), member 1 [Source:MGI Symbol;Acc:MGI:1345275]	protein_coding	1	+	74375195	74386062	177.29	-2.0488	0.243507	8.4137	3.97259e-17	8.43349e-15
ENSMUSG00000046879	Irgm1	immunity-related GTPase family M member 1 [Source:MGI Symbol;Acc:MGI:107567]	protein_coding	11	-	48861968	48871683	12.3135	-2.06292	0.655991	3.14474	0.00166236	0.0239033
ENSMUSG00000020704	Asic2	acid-sensing (proton-gated) ion channel 2 [Source:MGI Symbol;Acc:MGI:1100867]	protein_coding	11	-	80880169	81968457	36.0976	-2.09459	0.566192	3.69943	0.000216085	0.0045121
ENSMUSG00000029847	Slc23a4	solute carrier family 23 member 4 [Source:MGI Symbol;Acc:MGI:1917272]	protein_coding	6	-	34945278	34988404	38.0929	-2.10179	0.412203	5.09892	3.416e-07	1.49609e-05
ENSMUSG00000052316	Lrrc15	leucine rich repeat containing 15 [Source:MGI Symbol;Acc:MGI:1921738]	protein_coding	16	-	30269302	30283256	142.777	-2.10772	0.200394	10.5179	7.14604e-26	3.12078e-23
ENSMUSG00000024186	Rgs11	regulator of G-protein signaling 11 [Source:MGI Symbol;Acc:MGI:1354739]	protein_coding	17	+	26202951	26211324	94.3386	-2.11081	0.378479	5.57709	2.44575e-08	1.31631e-06
ENSMUSG00000105039	Gm32585	predicted gene, 32585 [Source:MGI Symbol;Acc:MGI:5591744]	lincRNA	5	-	125238314	125272815	11.2975	-2.14718	0.704974	3.04576	0.00232096	0.0308486
ENSMUSG00000030889	Vwa3a	von Willebrand factor A domain containing 3A [Source:MGI Symbol;Acc:MGI:3041229]	protein_coding	7	+	120739318	120805742	19.0053	-2.29149	0.544549	4.20805	2.57583e-05	0.000708122
ENSMUSG00000034282	Evpl	envoplakin [Source:MGI Symbol;Acc:MGI:107507]	protein_coding	11	-	116220559	116238077	18.2248	-2.29651	0.671536	3.41979	0.000626684	0.0109452
ENSMUSG00000033880	Lgals3bp	lectin, galactoside-binding, soluble, 3 binding protein [Source:MGI Symbol;Acc:MGI:99554]	protein_coding	11	-	118392751	118402092	12.4405	-2.32264	0.694973	3.34206	0.000831582	0.0137562
ENSMUSG00000032517	Mobp	myelin-associated oligodendrocytic basic protein [Source:MGI Symbol;Acc:MGI:108511]	protein_coding	9	+	120149707	120181484	161.021	-2.3551	0.222758	10.5725	3.99884e-26	1.85219e-23
ENSMUSG00000051747	Ttn	titin [Source:MGI Symbol;Acc:MGI:98864]	protein_coding	2	-	76703980	76982547	901.808	-2.368	0.084257	28.1044	8.64627e-174	1.32158e-169
ENSMUSG00000029420	Rimbp2	RIMS binding protein 2 [Source:MGI Symbol;Acc:MGI:2443235]	protein_coding	5	-	128757791	128953486	40.874	-2.45246	0.432373	5.67209	1.41062e-08	7.89793e-07
ENSMUSG00000040726	Hesx1	homeobox gene expressed in ES cells [Source:MGI Symbol;Acc:MGI:96071]	protein_coding	14	+	26994416	27002329	41.8024	-2.47905	0.347951	7.12469	1.04313e-12	1.0996e-10
ENSMUSG00000079363	Gbp4	guanylate binding protein 4 [Source:MGI Symbol;Acc:MGI:97072]	protein_coding	5	-	105115767	105139586	16.4157	-2.49274	0.702882	3.54645	0.00039046	0.00728874
ENSMUSG00000064080	Fbln2	fibulin 2 [Source:MGI Symbol;Acc:MGI:95488]	protein_coding	6	+	91212455	91272540	50.8455	-2.5218	0.431258	5.84754	4.98896e-09	3.07485e-07
ENSMUSG00000022464	Slc38a4	solute carrier family 38, member 4 [Source:MGI Symbol;Acc:MGI:1916604]	protein_coding	15	-	96994823	97055956	739.478	-2.52455	0.403023	6.26402	3.75176e-10	2.81106e-08
ENSMUSG00000031825	Crispld2	cysteine-rich secretory protein LCCL domain containing 2 [Source:MGI Symbol;Acc:MGI:1926142]	protein_coding	8	+	119992438	120052793	31.4883	-2.55871	0.591626	4.32488	1.52617e-05	0.000457403
ENSMUSG00000005338	Cadm3	cell adhesion molecule 3 [Source:MGI Symbol;Acc:MGI:2137858]	protein_coding	1	-	173333258	173367695	12.6326	-2.56575	0.755094	3.39792	0.000679003	0.0117139
ENSMUSG00000027579	Srms	src-related kinase lacking C-terminal regulatory tyrosine and N-terminal myristylation sites [Source:MGI Symbol;Acc:MGI:101865]	protein_coding	2	-	181205562	181213185	18.7315	-2.63148	0.543052	4.84573	1.26149e-06	4.93144e-05
ENSMUSG00000030200	Bcl2l14	BCL2-like 14 (apoptosis facilitator) [Source:MGI Symbol;Acc:MGI:1914063]	protein_coding	6	+	134396318	134438736	45.3342	-2.6546	0.363247	7.30797	2.71199e-13	3.21339e-11
ENSMUSG00000036885	Arhgef26	Rho guanine nucleotide exchange factor (GEF) 26 [Source:MGI Symbol;Acc:MGI:1918053]	protein_coding	3	+	62338344	62462221	45.1043	-2.66879	0.493737	5.40529	6.47029e-08	3.2006e-06
ENSMUSG00000071757	Zhx2	zinc fingers and homeoboxes 2 [Source:MGI Symbol;Acc:MGI:2683087]	protein_coding	15	+	57694665	57839832	17.3333	-2.69018	0.865718	3.10745	0.00188707	0.0262994
ENSMUSG00000031558	Slit2	slit homolog 2 (Drosophila) [Source:MGI Symbol;Acc:MGI:1315205]	protein_coding	5	+	47983138	48307733	273.468	-2.78102	0.200001	13.905	5.90332e-44	5.01291e-41
ENSMUSG00000005268	Prlr	prolactin receptor [Source:MGI Symbol;Acc:MGI:97763]	protein_coding	15	+	10177238	10349180	15.4592	-2.78501	0.654849	4.25291	2.11012e-05	0.000597282
ENSMUSG00000003657	Calb2	calbindin 2 [Source:MGI Symbol;Acc:MGI:101914]	protein_coding	8	-	110137502	110168210	47.2837	-2.79602	0.4724	5.91875	3.24392e-09	2.06945e-07
ENSMUSG00000048217	Nags	N-acetylglutamate synthase [Source:MGI Symbol;Acc:MGI:2387600]	protein_coding	11	+	102145513	102149477	24.5276	-2.81649	0.651858	4.32072	1.55521e-05	0.000462479
ENSMUSG00000032420	Nt5e	5' nucleotidase, ecto [Source:MGI Symbol;Acc:MGI:99782]	protein_coding	9	+	88327197	88372092	45.0687	-2.86418	0.478104	5.99072	2.08919e-09	1.38841e-07
ENSMUSG00000097543	Gm805	predicted gene 805 [Source:MGI Symbol;Acc:MGI:2685651]	lincRNA	12	+	86169341	86195102	6.42363	-2.95	0.994575	2.96609	0.0030161	0.0374122
ENSMUSG00000027347	Rasgrp1	RAS guanyl releasing protein 1 [Source:MGI Symbol;Acc:MGI:1314635]	protein_coding	2	-	117279993	117343001	59.9077	-2.9528	0.725576	4.06959	4.70969e-05	0.00120784
ENSMUSG00000106927	Gm43598	predicted gene 43598 [Source:MGI Symbol;Acc:MGI:5663735]	lincRNA	5	-	150597062	150599540	9.25353	-2.97148	0.885302	3.35645	0.000789487	0.0131801
ENSMUSG00000030638	Sh3gl3	SH3-domain GRB2-like 3 [Source:MGI Symbol;Acc:MGI:700011]	protein_coding	7	+	82173840	82307419	51.8405	-3.02894	0.408856	7.40833	1.279e-13	1.64281e-11
ENSMUSG00000084856	Gm11528	predicted gene 11528 [Source:MGI Symbol;Acc:MGI:3649788]	lincRNA	11	+	95622660	95629836	63.1632	-3.04419	0.415138	7.33296	2.25122e-13	2.68828e-11
ENSMUSG00000042417	Ccno	cyclin O [Source:MGI Symbol;Acc:MGI:2145534]	protein_coding	13	+	112987802	112990777	11.0297	-3.04907	1.01076	3.01661	0.00255619	0.0331957
ENSMUSG00000087088	Gm16638	predicted gene, 16638 [Source:MGI Symbol;Acc:MGI:4439562]	antisense_RNA	7	-	83597048	83631880	12.2388	-3.09263	1.0278	3.00897	0.00262135	0.033686
ENSMUSG00000061524	Zic2	zinc finger protein of the cerebellum 2 [Source:MGI Symbol;Acc:MGI:106679]	protein_coding	14	+	122475435	122479852	940.396	-3.20997	0.126303	25.4148	1.72933e-142	1.32164e-138
ENSMUSG00000004508	Gab2	growth factor receptor bound protein 2-associated protein 2 [Source:MGI Symbol;Acc:MGI:1333854]	protein_coding	7	+	97081586	97308946	6.19005	-3.23456	1.08782	2.97345	0.00294476	0.0368089
ENSMUSG00000054423	Cadps	Ca2+-dependent secretion activator [Source:MGI Symbol;Acc:MGI:1350922]	protein_coding	14	-	12372563	12823079	10.6868	-3.23975	0.832041	3.89374	9.87116e-05	0.00230704
ENSMUSG00000041134	Cyyr1	cysteine and tyrosine-rich protein 1 [Source:MGI Symbol;Acc:MGI:2152187]	protein_coding	16	-	85421533	85553397	26.8909	-3.27456	0.513157	6.3812	1.75708e-10	1.3988e-08
ENSMUSG00000086159	Gm13025	predicted gene 13025 [Source:MGI Symbol;Acc:MGI:3650883]	lincRNA	4	+	140679753	140684617	7.37976	-3.40094	1.1194	3.03818	0.00238014	0.0313624
ENSMUSG00000070331	Qrich2	glutamine rich 2 [Source:MGI Symbol;Acc:MGI:2684912]	protein_coding	11	-	116441325	116466241	7.66709	-3.43858	1.17413	2.92862	0.00340472	0.0410096
ENSMUSG00000004359	Spic	Spi-C transcription factor (Spi-1/PU.1 related) [Source:MGI Symbol;Acc:MGI:1341168]	protein_coding	10	-	88674772	88685015	17.936	-3.56564	0.709223	5.02753	4.96851e-07	2.08065e-05
ENSMUSG00000099911	1700044C05Rik	RIKEN cDNA 1700044C05 gene [Source:MGI Symbol;Acc:MGI:1920556]	lincRNA	14	+	118365878	118398170	6.88209	-3.61938	1.00206	3.61194	0.000303911	0.0059725
ENSMUSG00000071984	Fndc1	fibronectin type III domain containing 1 [Source:MGI Symbol;Acc:MGI:1915905]	protein_coding	17	-	7738569	7827302	20.3396	-3.64154	0.994388	3.66209	0.000250162	0.00507126
ENSMUSG00000101731	3830432H09Rik	RIKEN cDNA 3830432H09 gene [Source:MGI Symbol;Acc:MGI:2443278]	lincRNA	1	-	119529480	119536165	8.76889	-3.70012	1.24098	2.98161	0.00286739	0.0360725
ENSMUSG00000034177	Rnf43	ring finger protein 43 [Source:MGI Symbol;Acc:MGI:2442609]	protein_coding	11	+	87662722	87735539	9.92773	-3.77317	1.13005	3.33895	0.000840954	0.0138812
ENSMUSG00000070942	Il1rl2	interleukin 1 receptor-like 2 [Source:MGI Symbol;Acc:MGI:1913107]	protein_coding	1	+	40324610	40367562	7.12631	-3.84496	1.02511	3.75078	0.000176284	0.00378441
ENSMUSG00000072662	Mansc4	MANSC domain containing 4 [Source:MGI Symbol;Acc:MGI:3645619]	protein_coding	6	-	147075060	147087032	6.13816	-3.9532	1.33227	2.96726	0.00300467	0.037369
ENSMUSG00000052914	Cyp2j6	cytochrome P450, family 2, subfamily j, polypeptide 6 [Source:MGI Symbol;Acc:MGI:1270148]	protein_coding	4	-	96516138	96553661	4.6668	-4.2704	1.42369	2.99953	0.00270393	0.0345653
ENSMUSG00000000693	Loxl3	lysyl oxidase-like 3 [Source:MGI Symbol;Acc:MGI:1337004]	protein_coding	6	+	83034173	83052562	5.23786	-4.2872	1.26613	3.38606	0.000709031	0.012109
ENSMUSG00000079497	Gm13420	predicted gene 13420 [Source:MGI Symbol;Acc:MGI:3649917]	protein_coding	2	-	29744919	29751685	4.88232	-4.44256	1.44221	3.08037	0.00206744	0.0281146
ENSMUSG00000080727	C920021L13Rik	RIKEN cDNA C920021L13 gene [Source:MGI Symbol;Acc:MGI:1923991]	antisense_RNA	3	+	95871522	95889093	5.03647	-4.44501	1.42832	3.11206	0.00185786	0.0260527
ENSMUSG00000037716	Ccdc33	coiled-coil domain containing 33 [Source:MGI Symbol;Acc:MGI:1922464]	protein_coding	9	-	58028677	58118823	6.98727	-4.44827	1.41332	3.14738	0.00164739	0.0237775
ENSMUSG00000075225	Ccdc162	coiled-coil domain containing 162 [Source:MGI Symbol;Acc:MGI:1923223]	protein_coding	10	-	41538846	41716634	3.96699	-4.48608	1.45606	3.08098	0.00206321	0.0280821
ENSMUSG00000037736	Limch1	LIM and calponin homology domains 1 [Source:MGI Symbol;Acc:MGI:1924819]	protein_coding	5	+	66745827	67057158	20.7811	-4.4986	0.671626	6.69807	2.11189e-11	1.92144e-09
ENSMUSG00000029819	Npy	neuropeptide Y [Source:MGI Symbol;Acc:MGI:97374]	protein_coding	6	+	49822710	49829507	10.2263	-4.50434	1.02846	4.3797	1.18846e-05	0.000371483
ENSMUSG00000033634	Nat8f2	N-acetyltransferase 8 (GCN5-related) family member 2 [Source:MGI Symbol;Acc:MGI:2136446]	protein_coding	6	-	85865422	85869158	4.42466	-4.60468	1.53517	2.99946	0.00270462	0.0345653
ENSMUSG00000097762	4732463B04Rik	RIKEN cDNA 4732463B04 gene [Source:MGI Symbol;Acc:MGI:3642483]	antisense_RNA	12	-	84039469	84053807	4.09967	-4.64329	1.54083	3.01349	0.00258261	0.0333902
ENSMUSG00000024502	Jakmip2	janus kinase and microtubule interacting protein 2 [Source:MGI Symbol;Acc:MGI:1923467]	protein_coding	18	-	43531408	43687773	3.50693	-4.64731	1.57733	2.94632	0.00321579	0.0393849
ENSMUSG00000086152	Gm11454	predicted gene 11454 [Source:MGI Symbol;Acc:MGI:3650530]	lincRNA	2	+	163122606	163143959	8.10904	-4.6602	1.52785	3.05018	0.00228707	0.0304776
ENSMUSG00000100029	D7Ertd128e	DNA segment, Chr 7, ERATO Doi 128, expressed [Source:MGI Symbol;Acc:MGI:1098716]	lincRNA	7	+	30885031	30886446	11.2237	-4.72215	1.30505	3.61838	0.000296456	0.0058696
ENSMUSG00000044359	P2ry4	pyrimidinergic receptor P2Y, G-protein coupled, 4 [Source:MGI Symbol;Acc:MGI:1926594]	protein_coding	X	-	100590154	100594869	7.50606	-4.77066	1.42723	3.3426	0.000829975	0.0137445
ENSMUSG00000027596	a	nonagouti [Source:MGI Symbol;Acc:MGI:87853]	protein_coding	2	+	154791402	155051012	7.64354	-4.80964	1.09958	4.37405	1.2196e-05	0.000379666
ENSMUSG00000086302	Gm13790	predicted gene 13790 [Source:MGI Symbol;Acc:MGI:3650747]	lincRNA	5	+	114551289	114554016	2.904	-4.9144	1.68944	2.90889	0.00362713	0.043044
ENSMUSG00000024155	Meiob	meiosis specific with OB domains [Source:MGI Symbol;Acc:MGI:1922428]	protein_coding	17	+	24804382	24839787	3.89487	-4.92599	1.64737	2.99021	0.00278784	0.035362
ENSMUSG00000029248	Thegl	theg spermatid protein like [Source:MGI Symbol;Acc:MGI:1919118]	protein_coding	5	+	77016023	77061529	2.89955	-4.96352	1.63367	3.03826	0.00237945	0.0313624
ENSMUSG00000034456	Uroc1	urocanase domain containing 1 [Source:MGI Symbol;Acc:MGI:2385332]	protein_coding	6	+	90333284	90364551	3.9284	-4.98938	1.5143	3.29485	0.000984752	0.0157943
ENSMUSG00000053030	Spink2	serine peptidase inhibitor, Kazal type 2 [Source:MGI Symbol;Acc:MGI:1917232]	protein_coding	5	-	77205107	77211471	3.05173	-5.02596	1.73089	2.90369	0.00368788	0.0435932
ENSMUSG00000036422	Pcdh8	protocadherin 8 [Source:MGI Symbol;Acc:MGI:1306800]	protein_coding	14	-	79766775	79771312	7.00301	-5.17755	1.33502	3.87825	0.000105209	0.00242919
ENSMUSG00000032908	Sgpp2	sphingosine-1-phosphate phosphotase 2 [Source:MGI Symbol;Acc:MGI:3589109]	protein_coding	1	+	78310345	78420289	19.6135	-5.23585	1.16649	4.48853	7.17149e-06	0.000237264
ENSMUSG00000074151	Nlrc5	NLR family, CARD domain containing 5 [Source:MGI Symbol;Acc:MGI:3612191]	protein_coding	8	+	94434356	94527272	5.46332	-5.24569	1.5192	3.45294	0.000554521	0.00981001
ENSMUSG00000037613	Tnfrsf23	tumor necrosis factor receptor superfamily, member 23 [Source:MGI Symbol;Acc:MGI:1930269]	protein_coding	7	-	143665809	143685872	2.96456	-5.28521	1.77088	2.98451	0.00284036	0.0358209
ENSMUSG00000028860	Sytl1	synaptotagmin-like 1 [Source:MGI Symbol;Acc:MGI:1933365]	protein_coding	4	-	133253090	133263113	6.94923	-5.36084	1.32647	4.04144	5.3125e-05	0.00134217
ENSMUSG00000059334	Zfp36l3	zinc finger protein 36, C3H type-like 3 [Source:MGI Symbol;Acc:MGI:3525151]	protein_coding	X	-	53774048	53776394	5.74972	-5.61237	1.35423	4.14433	3.40814e-05	0.00090127
ENSMUSG00000029561	Oasl2	2'-5' oligoadenylate synthetase-like 2 [Source:MGI Symbol;Acc:MGI:1344390]	protein_coding	5	+	114896936	114912234	2.83671	-5.62739	1.67365	3.36234	0.000772839	0.0129549
ENSMUSG00000054580	Pla2r1	phospholipase A2 receptor 1 [Source:MGI Symbol;Acc:MGI:102468]	protein_coding	2	-	60417543	60553308	3.99658	-5.64118	1.69601	3.32616	0.000880523	0.0143944
ENSMUSG00000067276	Capn6	calpain 6 [Source:MGI Symbol;Acc:MGI:1100850]	protein_coding	X	-	143802231	143827414	4.79194	-5.72176	1.55387	3.68227	0.000231167	0.0047684
